# Supplementary material for: Polyoxypregnane Glycosides from Root of Marsdenia tenacissima and Inhibited Nitric Oxide Levels in LPS Stimulated RAW 264.7 Cells
Source: MDPI journal article supplement (doi:10.3390/molecules28020886), 2023-01-16
Supplement: s1 [file s1]

Supplementary Material for:

## **Polyoxypregnane Glycosides from Root of *Marsdenia tenacissima* and Inhibited Nitric Oxide Levels in LPS Stimulated RAW 264.7 cells**

**Zhi Na <sup>1,\*</sup>, PianChou Gongpan <sup>1</sup>, Qingfei Fan <sup>2,\*</sup>**

<sup>1</sup> Key Laboratory of Tropical Plant Resources and Sustainable Use, Xishuangbanna Tropical Botanical Garden, Chinese Academy of Sciences, Mengla 666303, China; gongpan@xtbg.ac.cn (P.G.)

<sup>2</sup> College of Science, Yunnan Agricultural University, Kunming 650201, China

\* Correspondence: nazhi@xtbg.org.cn (Z. N.), fanqingfei@xtbg.ac.cn (Q.F.)

## Contents

### Figures

|                                                                                                                       |    |
|-----------------------------------------------------------------------------------------------------------------------|----|
| <b>Figure S1.</b> HRESIMS spectrum of compound <b>1</b> .....                                                         | 4  |
| <b>Figure S2.</b> <sup>1</sup> H-NMR (500 MHz, CDCl <sub>3</sub> ) spectrum of compound <b>1</b> .....                | 5  |
| <b>Figure S3.</b> <sup>13</sup> C-NMR and DEPT (125 MHz, CDCl <sub>3</sub> ) spectrum of compound <b>1</b> .....      | 5  |
| <b>Figure S4.</b> <sup>1</sup> H- <sup>1</sup> H COSY spectrum of compound <b>1</b> .....                             | 6  |
| <b>Figure S5.</b> HSQC spectrum of compound <b>1</b> .....                                                            | 6  |
| <b>Figure S6.</b> HMBC spectrum of compound <b>1</b> .....                                                            | 7  |
| <b>Figure S7.</b> ROESY spectrum of compound <b>1</b> .....                                                           | 7  |
| <b>Figure S8.</b> HREIMS spectrum of compound <b>2</b> .....                                                          | 8  |
| <b>Figure S9.</b> <sup>1</sup> H-NMR (500 MHz, CDCl <sub>3</sub> ) spectrum of compound <b>2</b> .....                | 9  |
| <b>Figure S10.</b> <sup>13</sup> C-NMR and DEPT (125 MHz, CDCl <sub>3</sub> ) spectrum of compound <b>2</b> .....     | 9  |
| <b>Figure S11.</b> <sup>1</sup> H- <sup>1</sup> H COSY spectrum of compound <b>2</b> .....                            | 10 |
| <b>Figure S12.</b> HSQC spectrum of compound <b>2</b> .....                                                           | 10 |
| <b>Figure S13.</b> HMBC spectrum of compound <b>2</b> .....                                                           | 11 |
| <b>Figure S14.</b> ROESY spectrum of compound <b>2</b> .....                                                          | 11 |
| <b>Figure S15.</b> HRESIMS spectrum of compound <b>3</b> .....                                                        | 12 |
| <b>Figure S16.</b> <sup>1</sup> H-NMR (500 MHz, CDCl <sub>3</sub> ) spectrum of compound <b>3</b> .....               | 13 |
| <b>Figure S17.</b> <sup>13</sup> C-NMR and DEPT (125 MHz, CDCl <sub>3</sub> ) spectrum of compound <b>3</b> .....     | 13 |
| <b>Figure S18.</b> <sup>1</sup> H- <sup>1</sup> H COSY spectrum of compound <b>3</b> .....                            | 14 |
| <b>Figure S19.</b> HSQC spectrum of compound <b>3</b> .....                                                           | 14 |
| <b>Figure S20.</b> HMBC Spectrum of compound <b>3</b> .....                                                           | 15 |
| <b>Figure S21.</b> ROESY Spectrum of compound <b>3</b> .....                                                          | 15 |
| <b>Figure S22.</b> HRESIMS spectrum of compound <b>4</b> .....                                                        | 16 |
| <b>Figure S23.</b> <sup>1</sup> H-NMR (500 MHz, pyridine- <i>d</i> <sub>5</sub> ) spectrum of compound <b>4</b> ..... | 17 |

|                                                                                                                 |    |
|-----------------------------------------------------------------------------------------------------------------|----|
| <b>Figure S24.</b> $^{13}\text{C}$ -NMR and DEPT (125 MHz, pyridine- $d_5$ ) spectrum of compound <b>4</b> .... | 17 |
| <b>Figure S25.</b> $^1\text{H}$ - $^1\text{H}$ COSY spectrum of compound <b>4</b> .....                         | 18 |
| <b>Figure S26.</b> HSQC spectrum of compound <b>4</b> .....                                                     | 18 |
| <b>Figure S27.</b> HMBC spectrum of compound <b>4</b> .....                                                     | 19 |
| <b>Figure S28.</b> ROESY spectrum of compound <b>4</b> .....                                                    | 19 |
| <b>Figure S29.</b> HRESIMS spectrum of compound <b>5</b> .....                                                  | 20 |
| <b>Figure S30.</b> $^1\text{H}$ -NMR (500 MHz, pyridine- $d_5$ ) spectrum of compound <b>5</b> .....            | 21 |
| <b>Figure S31.</b> $^{13}\text{C}$ -NMR and DEPT (125 MHz, pyridine- $d_5$ ) spectrum of compound <b>5</b> .... | 21 |
| <b>Figure S32.</b> $^1\text{H}$ - $^1\text{H}$ COSY spectrum of compound <b>5</b> .....                         | 22 |
| <b>Figure S33.</b> HSQC spectrum of compound <b>5</b> .....                                                     | 22 |
| <b>Figure S34.</b> HMBC spectrum of compound <b>5</b> .....                                                     | 23 |
| <b>Figure S35.</b> ROESY spectrum of compound <b>5</b> .....                                                    | 23 |
| <b>Figure S36.</b> HRESIMS spectrum of compound <b>6</b> .....                                                  | 24 |
| <b>Figure S37.</b> $^1\text{H}$ -NMR (500 MHz, pyridine- $d_5$ ) spectrum of compound <b>6</b> .....            | 25 |
| <b>Figure S38.</b> $^{13}\text{C}$ -NMR and DEPT (125 MHz, pyridine- $d_5$ ) spectrum of compound <b>6</b> .... | 25 |
| <b>Figure S39.</b> $^1\text{H}$ - $^1\text{H}$ COSY spectrum of compound <b>6</b> .....                         | 26 |
| <b>Figure S40.</b> HSQC spectrum of compound <b>6</b> .....                                                     | 26 |
| <b>Figure S41.</b> HMBC spectrum of compound <b>6</b> .....                                                     | 27 |
| <b>Figure S42.</b> ROESY spectrum of compound <b>6</b> .....                                                    | 27 |
| <b>Figure S43.</b> HRESIMS spectrum of compound <b>7</b> .....                                                  | 28 |
| <b>Figure S44.</b> $^1\text{H}$ -NMR (500 MHz, pyridine- $d_5$ ) spectrum of compound <b>7</b> .....            | 29 |
| <b>Figure S45.</b> $^{13}\text{C}$ -NMR and DEPT (125 MHz, pyridine- $d_5$ ) spectrum of compound <b>7</b> .... | 29 |
| <b>Figure S46.</b> The $^1\text{H}$ - $^1\text{H}$ COSY spectrum of compound <b>7</b> .....                     | 30 |
| <b>Figure S47.</b> HSQC spectrum of compound <b>7</b> .....                                                     | 30 |
| <b>Figure S48.</b> HMBC spectrum of compound <b>7</b> .....                                                     | 31 |
| <b>Figure S49.</b> ROESY spectrum of compound <b>7</b> .....                                                    | 31 |
| <b>Figure S50.</b> Effects of compounds <b>1–7</b> on cell viability.....                                       | 32 |

## Qualitative Analysis Report

|                               |              |                      |                       |
|-------------------------------|--------------|----------------------|-----------------------|
| <b>Data Filename</b>          | ndbj-53.d    | <b>Sample Name</b>   | ndbj-53               |
| <b>Sample Type</b>            | Sample       | <b>Position</b>      | P1-F2                 |
| <b>Instrument Name</b>        | Instrument 1 | <b>User Name</b>     |                       |
| <b>Acq Method</b>             | s.m          | <b>Acquired Time</b> | 10/28/2020 2:27:28 PM |
| <b>IRM Calibration Status</b> | Success      | <b>DA Method</b>     | Default.m             |
| <b>Comment</b>                |              |                      |                       |

|                       |                             |              |
|-----------------------|-----------------------------|--------------|
| <b>Sample Group</b>   |                             | <b>Info.</b> |
| <b>Acquisition SW</b> | 6200 series TOF/6500 series |              |
| <b>Version</b>        | Q-TOF B.05.01 (B5125.2)     |              |

### User Spectra

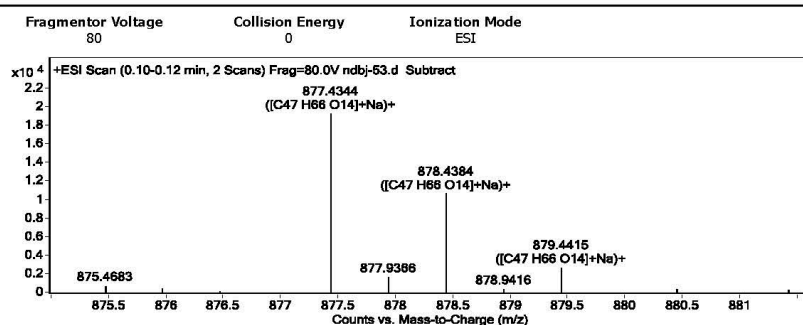

#### Peak List

| m/z       | z | Abund    | Formula     | Ion     |
|-----------|---|----------|-------------|---------|
| 551.301   | 1 | 1890.17  |             |         |
| 673.2979  | 1 | 2904.21  |             |         |
| 872.4793  | 1 | 3755.74  |             |         |
| 877.4344  | 1 | 19341.66 | C47 H66 O14 | (M+Na)+ |
| 878.4384  | 1 | 10693.28 | C47 H66 O14 | (M+Na)+ |
| 879.4415  | 1 | 2738.25  | C47 H66 O14 | (M+Na)+ |
| 893.4087  | 1 | 14138.9  |             |         |
| 894.4116  | 1 | 6676     |             |         |
| 895.4125  | 1 | 3179.64  |             |         |
| 1019.5192 | 1 | 3404.45  |             |         |

#### Formula Calculator Element Limits

| Element | Min | Max |
|---------|-----|-----|
| C       | 3   | 120 |
| H       | 0   | 240 |
| O       | 0   | 30  |

#### Formula Calculator Results

| Formula     | CalculatedMass | CalculatedMz | Mz       | Diff. (mDa) | Diff. (ppm) | DBE     |
|-------------|----------------|--------------|----------|-------------|-------------|---------|
| C47 H66 O14 | 854.4453       | 877.4345     | 877.4344 | 0.10        | 0.11        | 15.0000 |

--- End Of Report ---

**Figure S1 HRESIMS spectrum of compound 1**

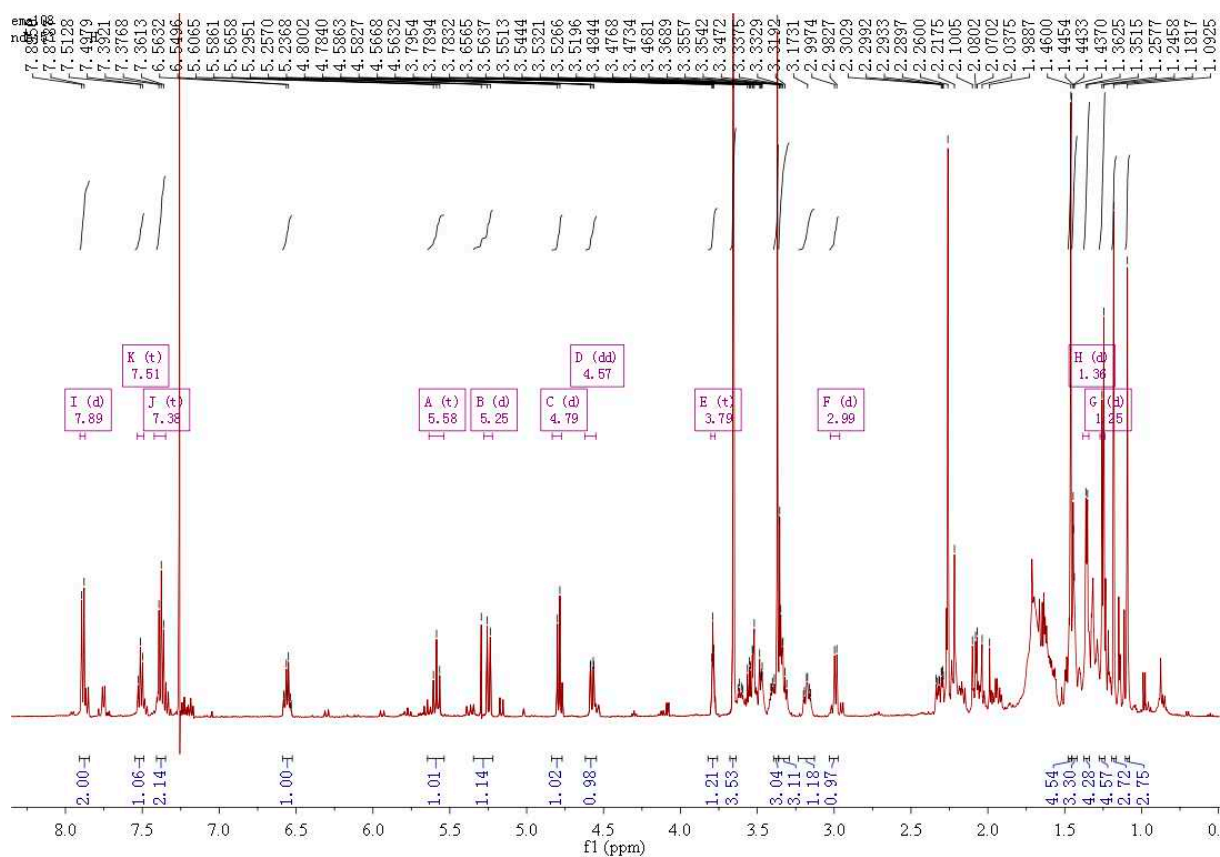

Figure S2  $^1\text{H}$ -NMR (500 MHz,  $\text{CDCl}_3$ ) spectrum of compound **1**

ndbj53  
ndbj53 hsqc

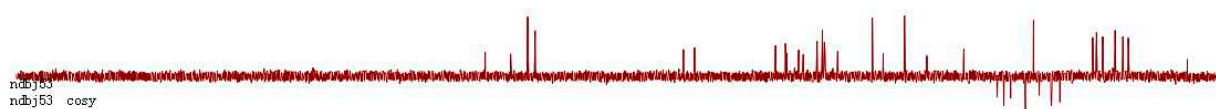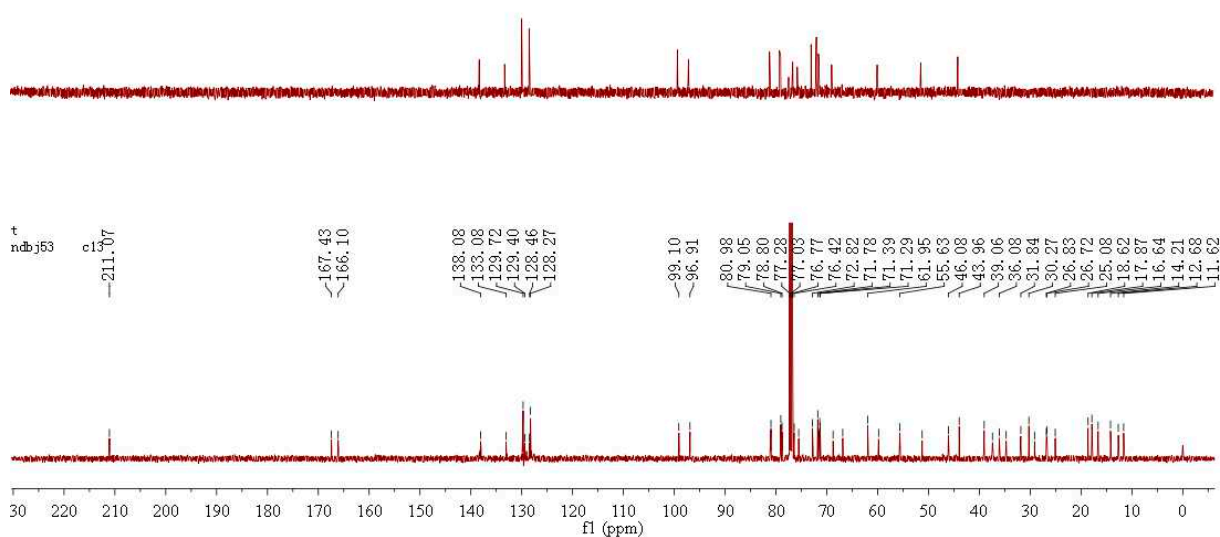

Figure S3  $^{13}\text{C}$ -NMR (125 MHz,  $\text{CDCl}_3$ ) and DEPT spectrum of compound **1**

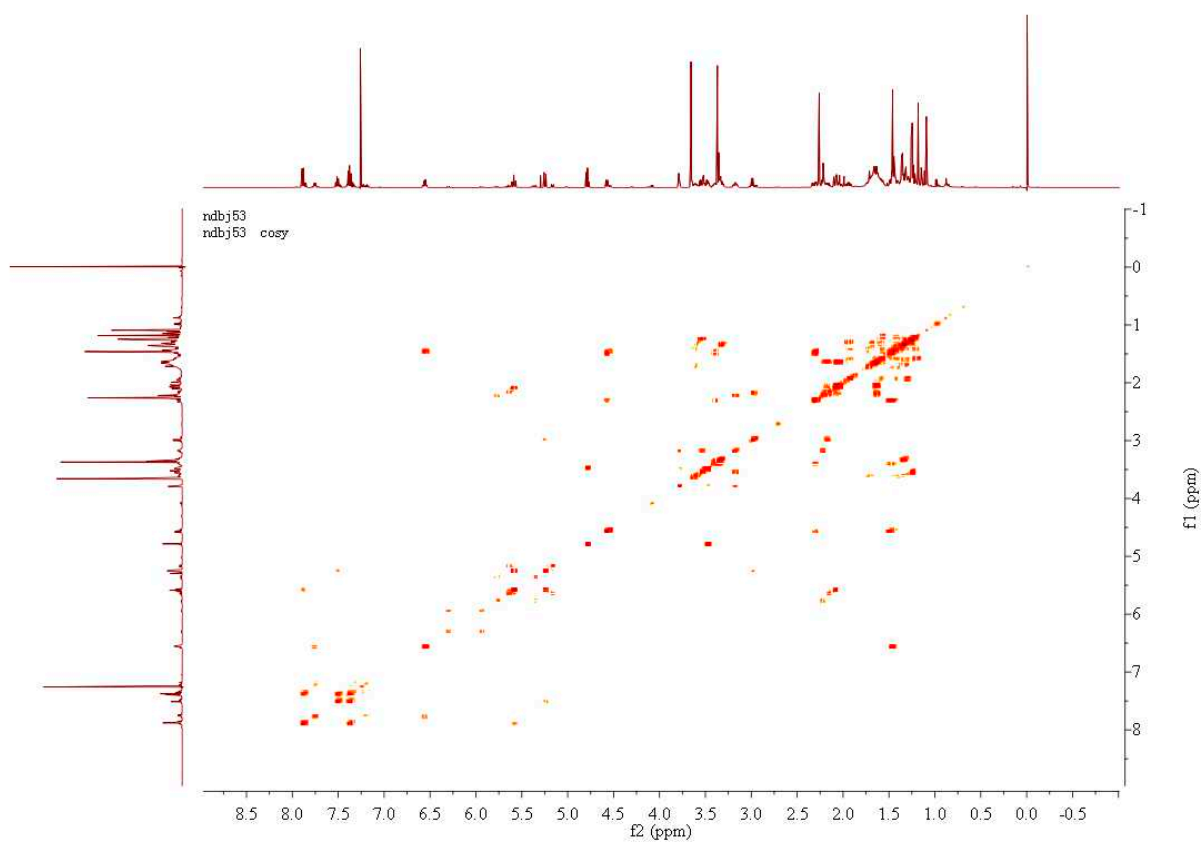

**Figure S5**  $^1\text{H}$ - $^1\text{H}$  COSY spectrum of compound **1**

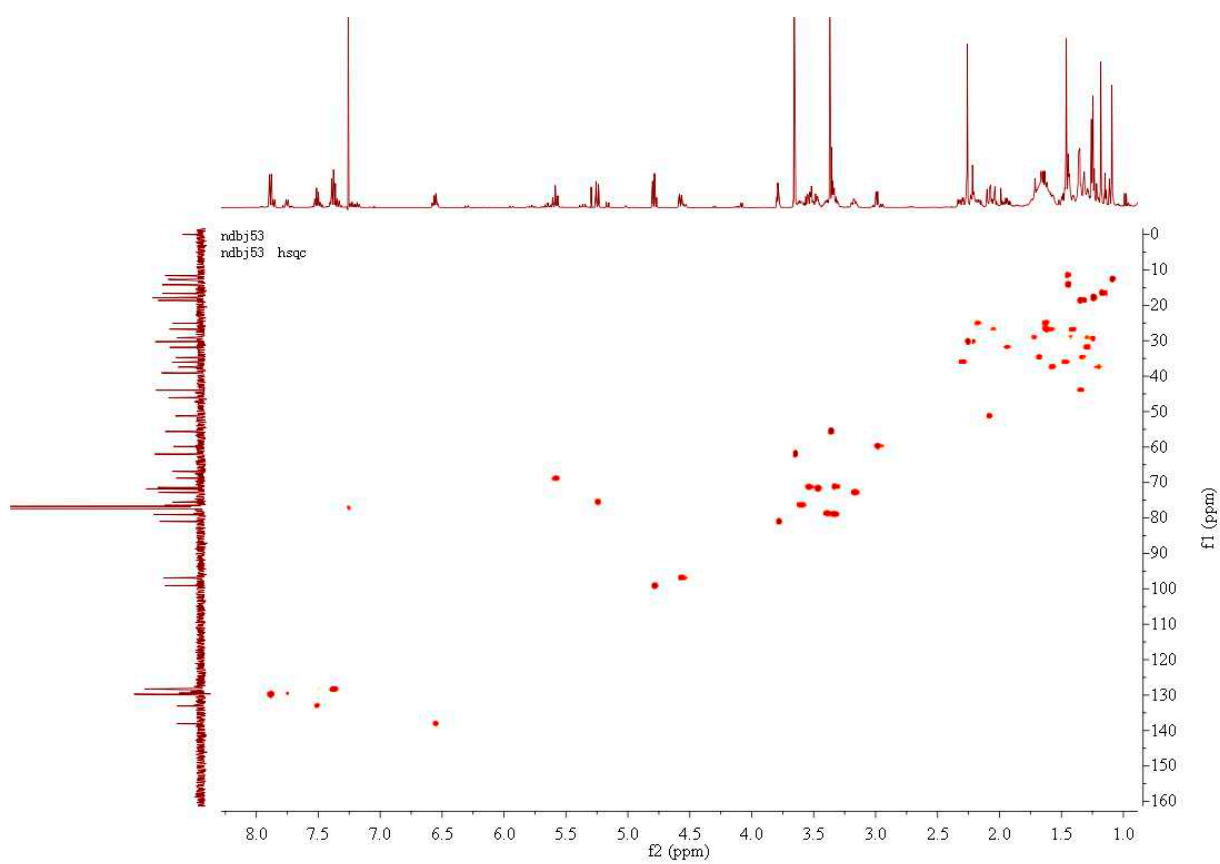

**Figure S5** HSQC spectrum of compound **1**

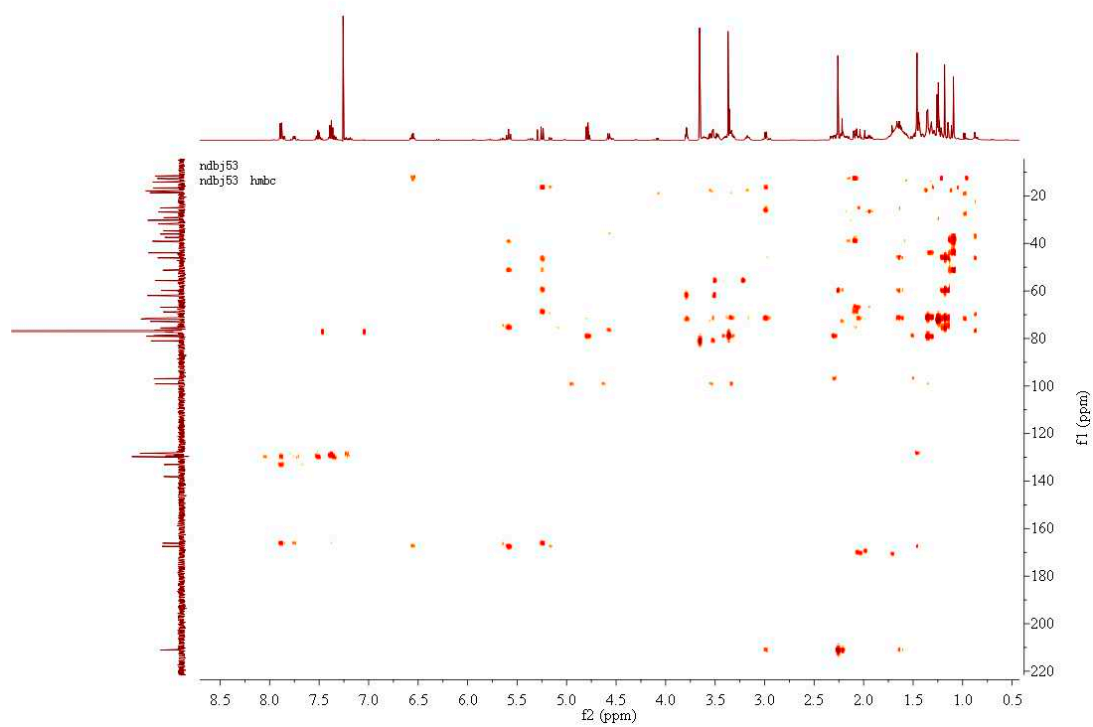

**Figure S6** HMBC spectrum of compound **1**

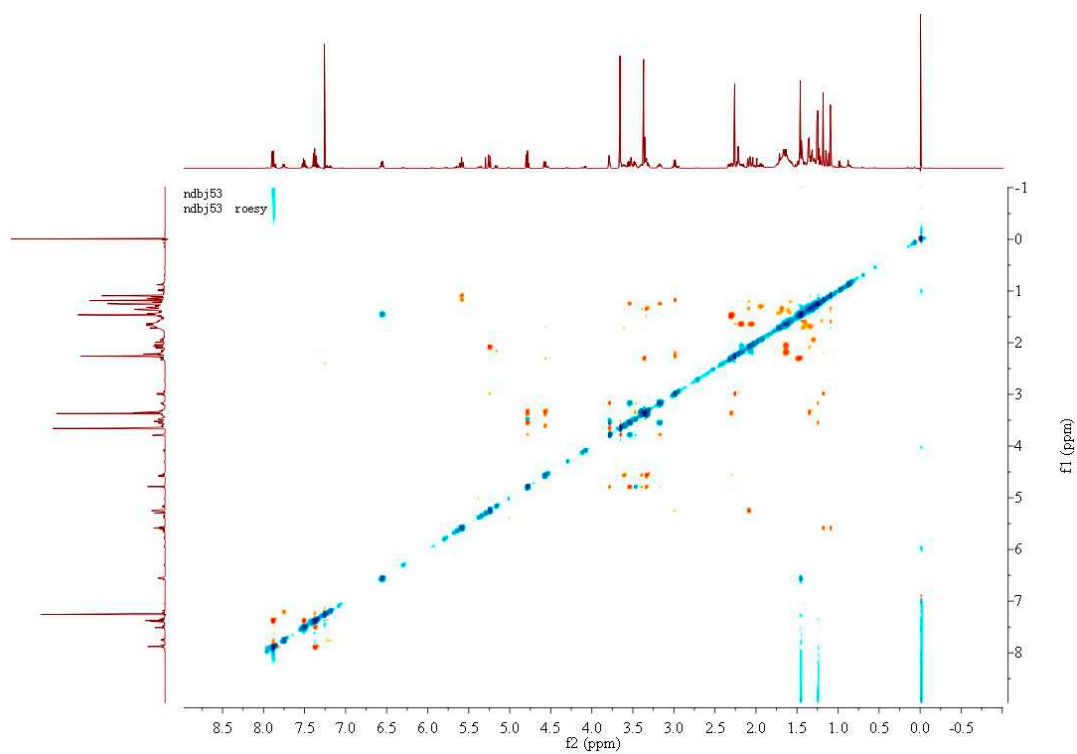

**Figure S7** ROESY Spectrum of Compound **1**

## Qualitative Analysis Report

|                               |              |                      |                       |
|-------------------------------|--------------|----------------------|-----------------------|
| <b>Data Filename</b>          | ndbj-55.d    | <b>Sample Name</b>   | ndbj-55               |
| <b>Sample Type</b>            | Sample       | <b>Position</b>      | P1-F3                 |
| <b>Instrument Name</b>        | Instrument 1 | <b>User Name</b>     |                       |
| <b>Acq Method</b>             | s.m          | <b>Acquired Time</b> | 10/28/2020 2:28:39 PM |
| <b>IRM Calibration Status</b> | Success      | <b>DA Method</b>     | Default.m             |
| <b>Comment</b>                |              |                      |                       |

|                       |                             |              |
|-----------------------|-----------------------------|--------------|
| <b>Sample Group</b>   |                             | <b>Info.</b> |
| <b>Acquisition SW</b> | 6200 series TOF/6500 series |              |
| <b>Version</b>        | Q-TOF B.05.01 (B5125.2)     |              |

### User Spectra

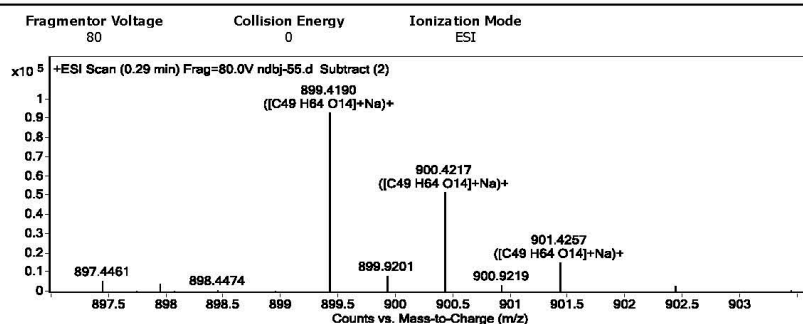

#### Peak List

| m/z      | z | Abund    | Formula     | Ion     |
|----------|---|----------|-------------|---------|
| 377.2662 | 1 | 27443.59 |             |         |
| 409.2559 | 1 | 15374.56 |             |         |
| 673.298  | 1 | 10130.33 |             |         |
| 865.4335 | 1 | 18937.1  |             |         |
| 894.4545 | 1 | 11253.08 |             |         |
| 899.419  | 1 | 93438.41 | C49 H64 O14 | (M+Na)+ |
| 900.4217 | 1 | 51815.04 | C49 H64 O14 | (M+Na)+ |
| 901.4257 | 1 | 15371.9  | C49 H64 O14 | (M+Na)+ |
| 915.3934 | 1 | 14416.72 |             |         |
| 916.3973 | 1 | 9985.13  |             |         |

#### Formula Calculator Element Limits

| Element | Min | Max |
|---------|-----|-----|
| C       | 3   | 120 |
| H       | 0   | 240 |
| O       | 0   | 30  |

#### Formula Calculator Results

| Formula     | CalculatedMass | CalculatedMz | Mz       | Diff. (mDa) | Diff. (ppm) | DBE     |
|-------------|----------------|--------------|----------|-------------|-------------|---------|
| C49 H64 O14 | 876.4296       | 899.4188     | 899.4190 | -0.20       | -0.22       | 18.0000 |

--- End Of Report ---

Figure S8 HRESIMS spectrum of compound 2



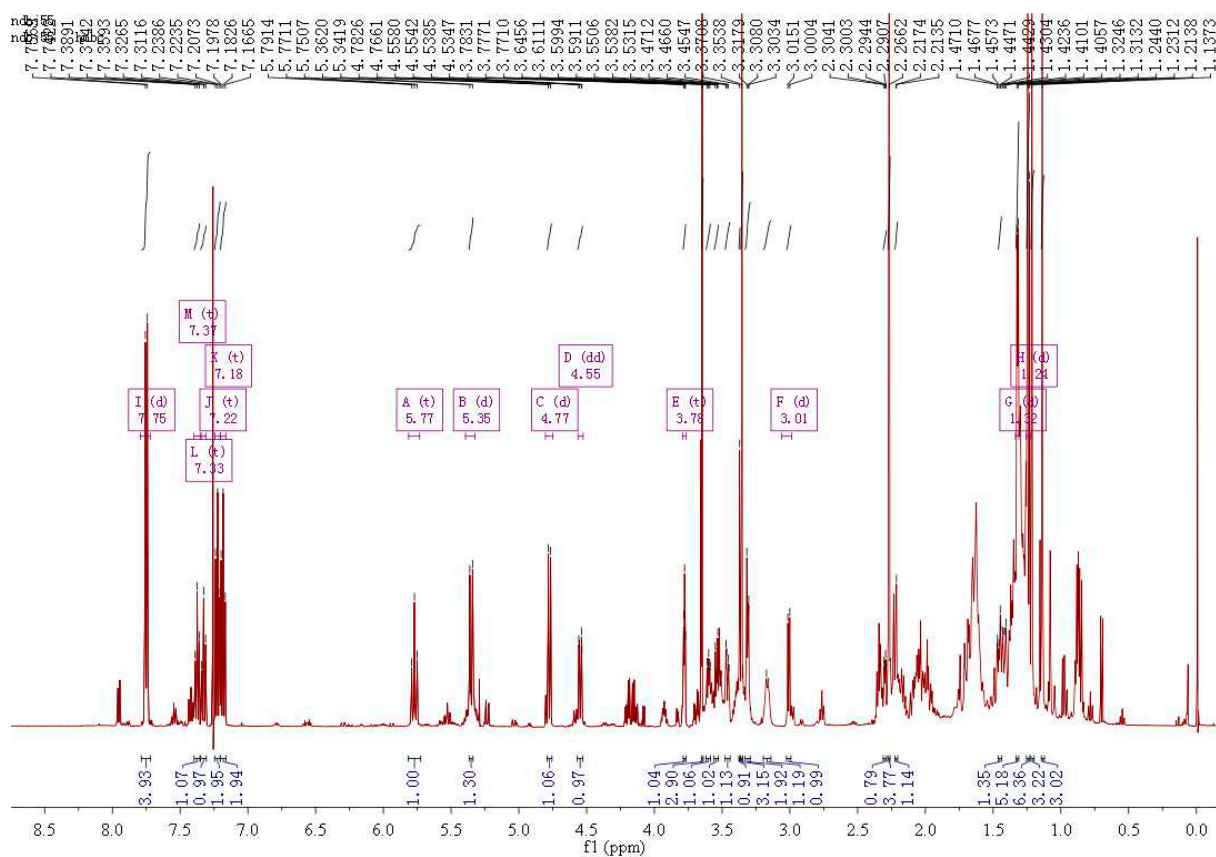

**Figure S9**  $^1\text{H}$ -NMR (500 MHz,  $\text{CDCl}_3$ ) spectrum of compound **2**

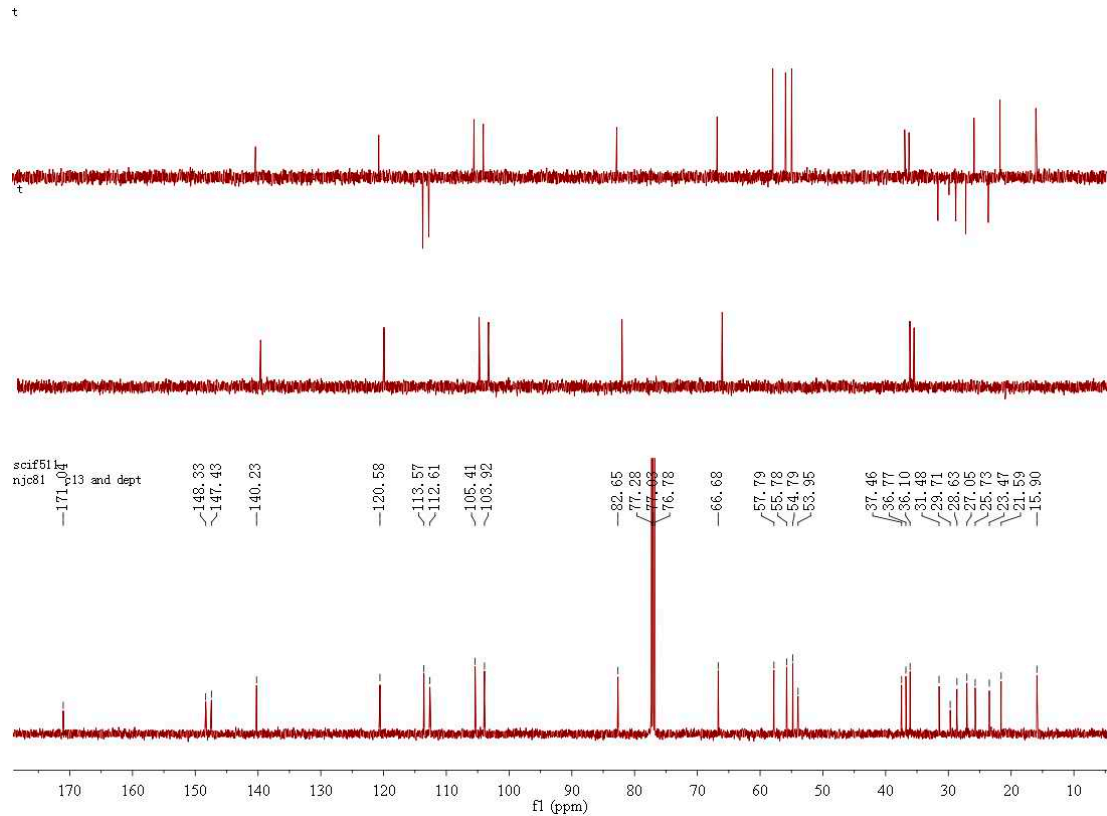

**Figure S10**  $^{13}\text{C}$ -NMR (125 MHz,  $\text{CDCl}_3$ ) and DEPT spectrum of compound **2**

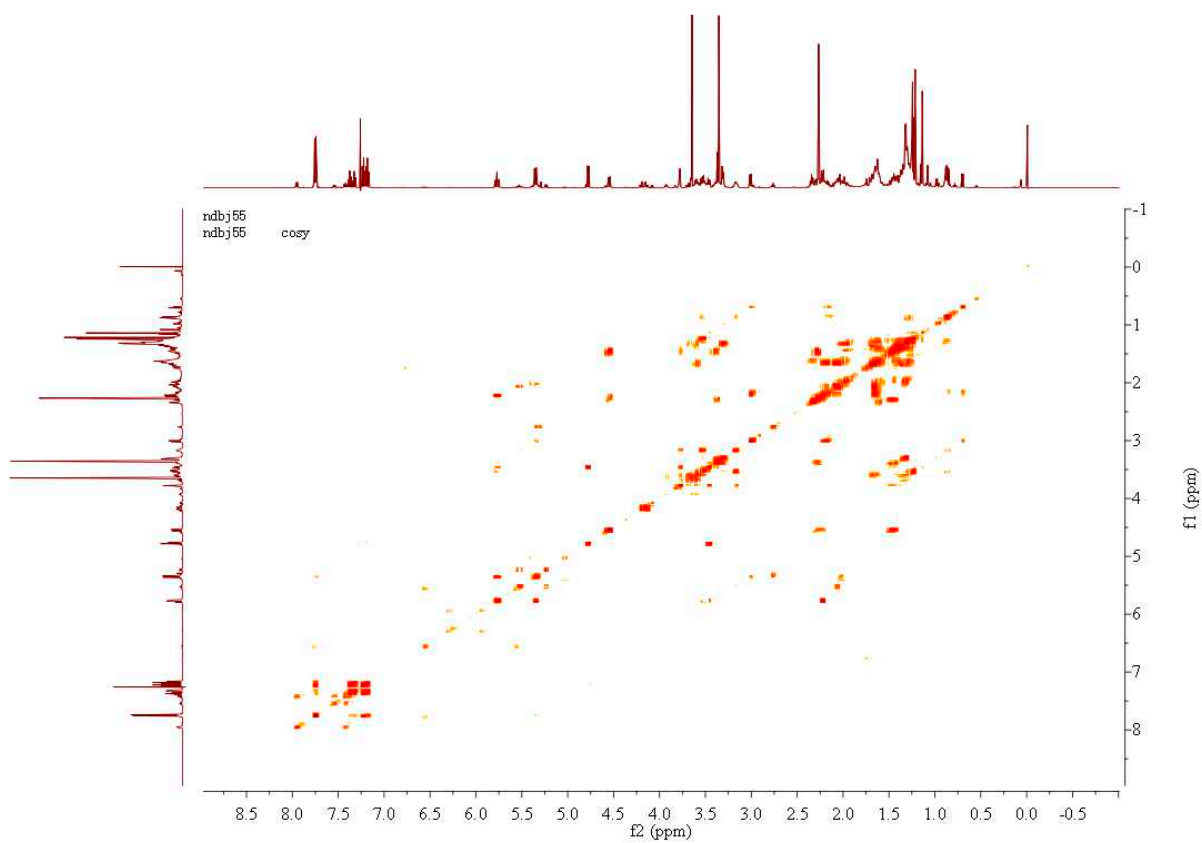

**Figure S11**  $^1\text{H}$ - $^1\text{H}$  COSY spectrum of compound **2**

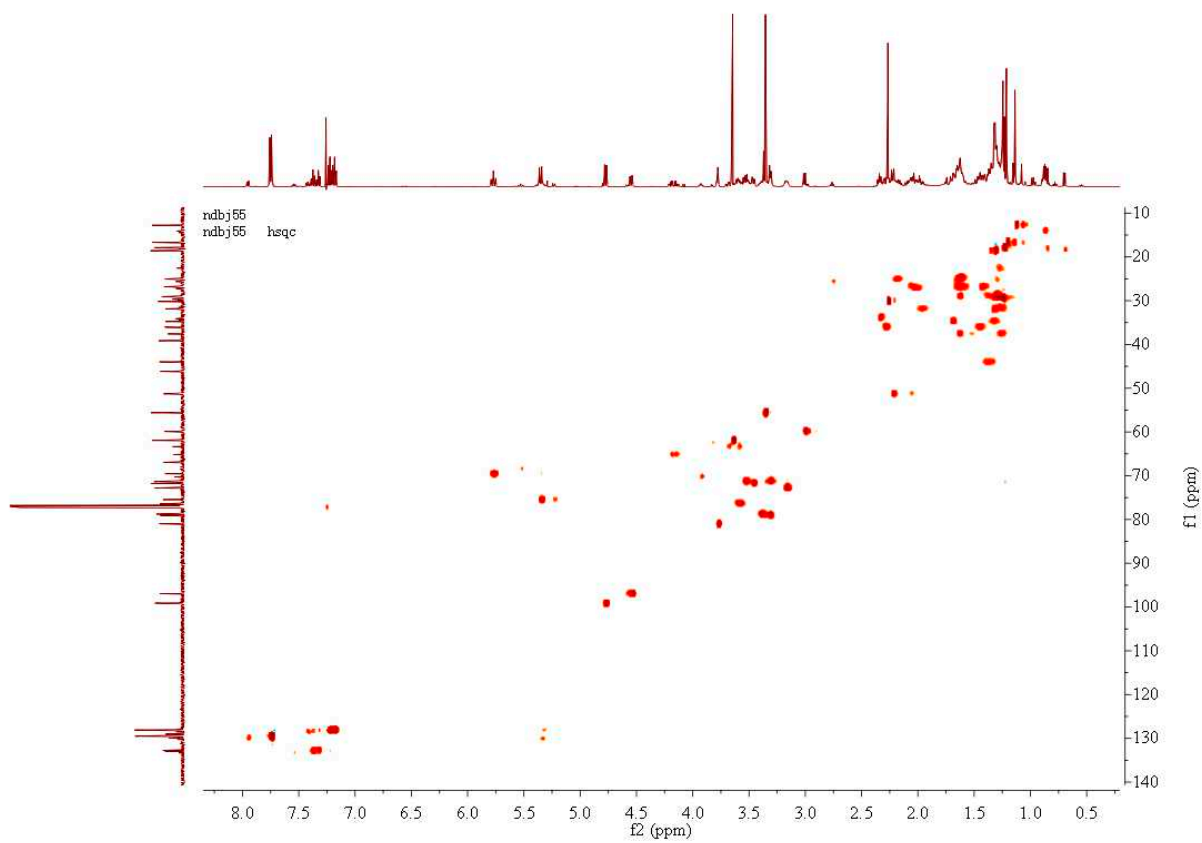

**Figure S12** HSQC spectrum of compound **2**

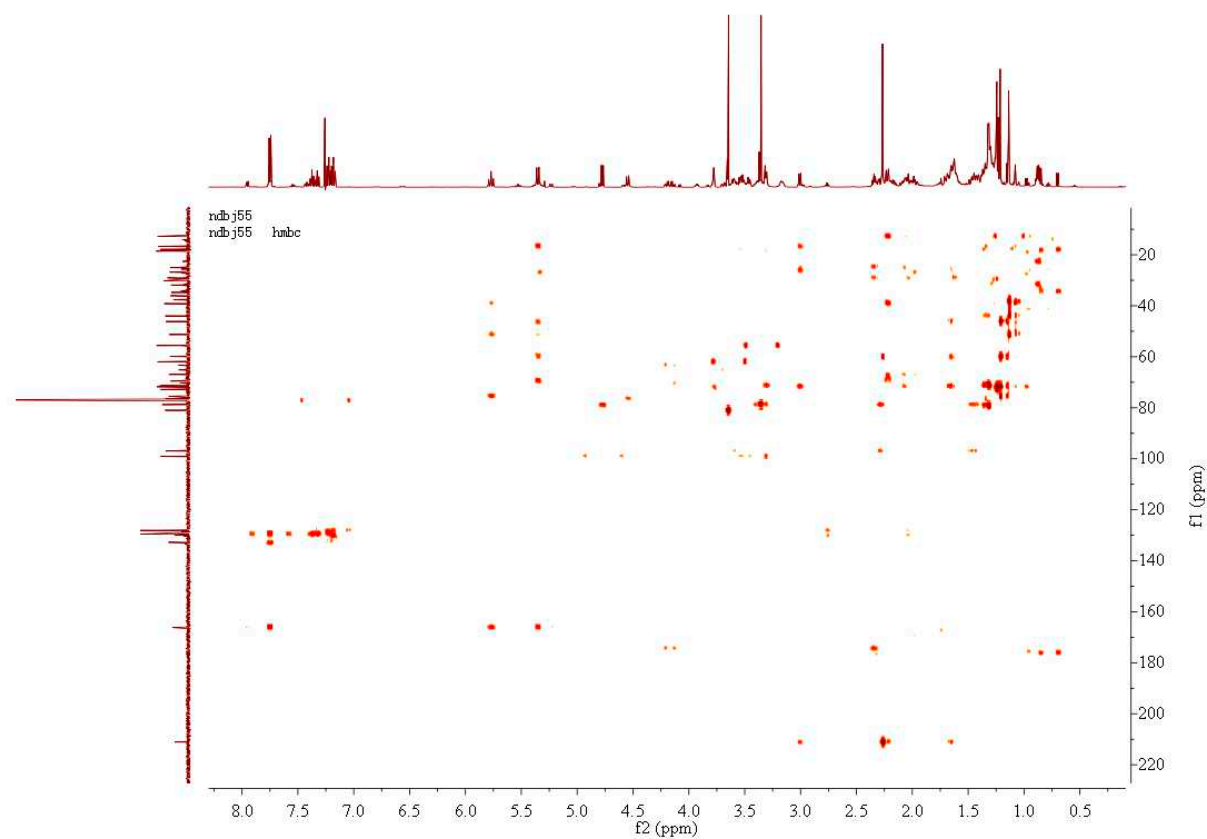

**Figure S13** HMBC spectrum of compound **2**

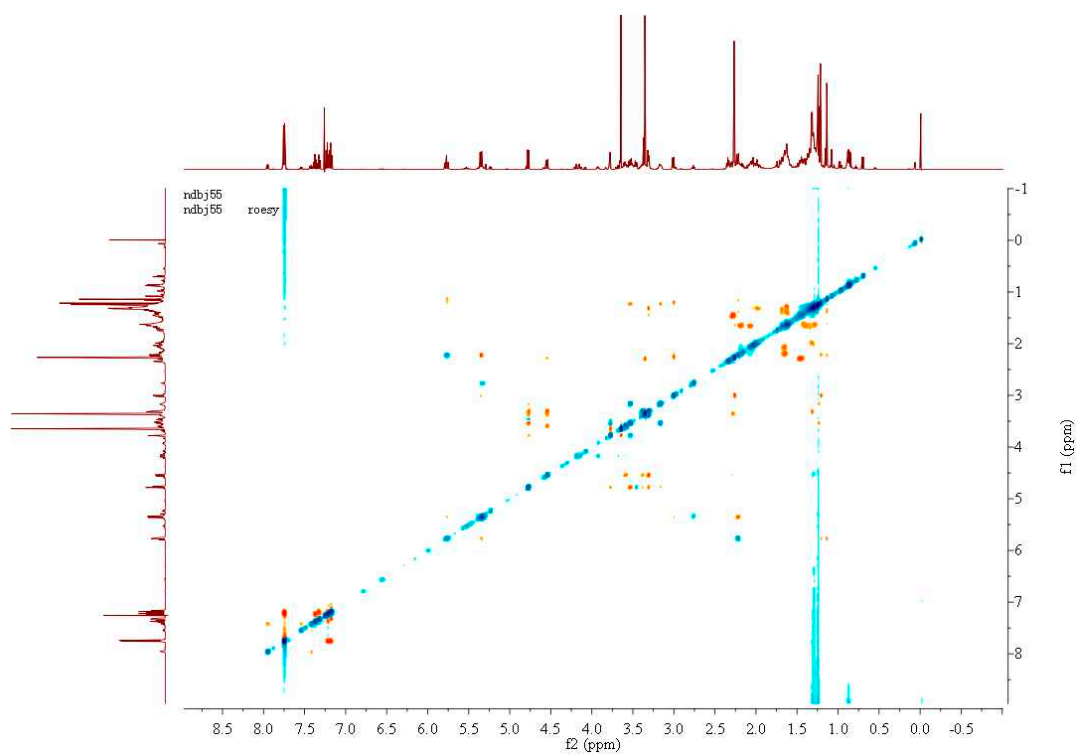

**Figure S14** ROESY spectrum of compound **2**

## Qualitative Analysis Report

|                               |              |                      |                       |
|-------------------------------|--------------|----------------------|-----------------------|
| <b>Data Filename</b>          | ndbj-18.d    | <b>Sample Name</b>   | ndbj-18               |
| <b>Sample Type</b>            | Sample       | <b>Position</b>      | P1-B1                 |
| <b>Instrument Name</b>        | Instrument 1 | <b>User Name</b>     |                       |
| <b>Acq Method</b>             | s.m          | <b>Acquired Time</b> | 12/25/2020 3:23:45 PM |
| <b>IRM Calibration Status</b> | Success      | <b>DA Method</b>     | Default.m             |
| <b>Comment</b>                |              |                      |                       |

|                       |                             |              |
|-----------------------|-----------------------------|--------------|
| <b>Sample Group</b>   |                             | <b>Info.</b> |
| <b>Acquisition SW</b> | 6200 series TOF/6500 series |              |
| <b>Version</b>        | Q-TOF B.05.01 (B5125.2)     |              |

### User Spectra

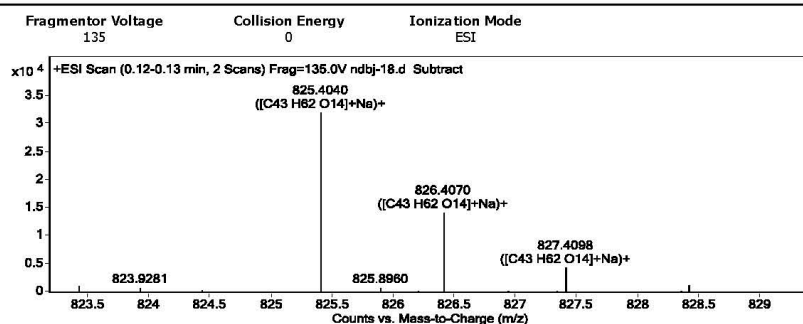

#### Peak List

| m/z       | z | Abund    | Formula     | Ion     |
|-----------|---|----------|-------------|---------|
| 347.2216  | 1 | 6409.36  |             |         |
| 365.2326  | 1 | 7015     |             |         |
| 499.2692  | 1 | 48087.03 |             |         |
| 500.2729  | 1 | 15768.36 |             |         |
| 691.3668  | 1 | 15865.02 |             |         |
| 692.3689  | 1 | 6742.21  |             |         |
| 820.4472  | 1 | 8841.49  |             |         |
| 825.404   | 1 | 32109.97 | C43 H62 O14 | (M+Na)+ |
| 826.407   | 1 | 14198.66 | C43 H62 O14 | (M+Na)+ |
| 1359.7437 | 1 | 5780.44  |             |         |

#### Formula Calculator Element Limits

| Element | Min | Max |
|---------|-----|-----|
| C       | 3   | 120 |
| H       | 0   | 240 |
| O       | 0   | 30  |

#### Formula Calculator Results

| Formula     | CalculatedMass | CalculatedMz | Mz       | Diff. (mDa) | Diff. (ppm) | DBE     |
|-------------|----------------|--------------|----------|-------------|-------------|---------|
| C43 H62 O14 | 802.4140       | 825.4032     | 825.4040 | -0.80       | -0.97       | 13.0000 |

--- End Of Report ---

Figure S15 HRESIMS spectrum of compound 3

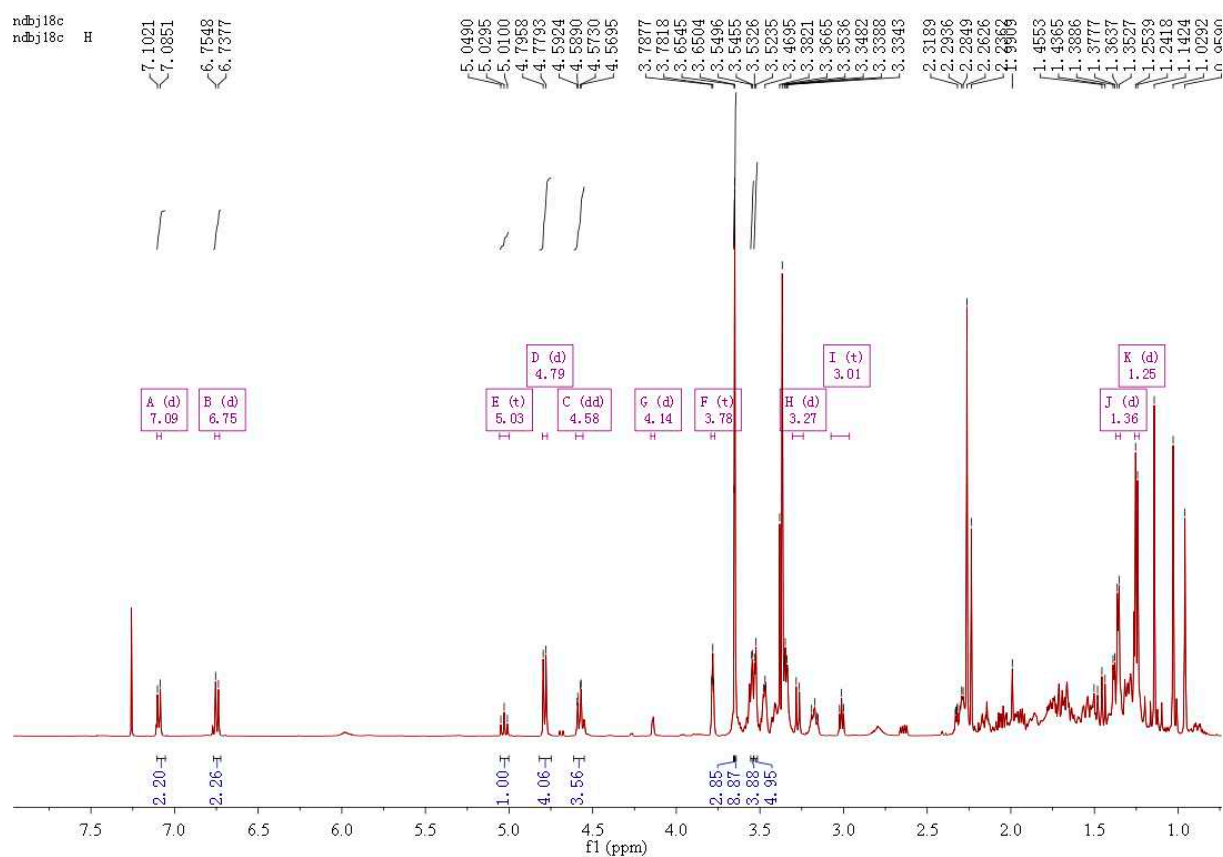

**Figure S16**  $^1\text{H}$ -NMR (500 MHz,  $\text{CDCl}_3$ ) spectrum of compound **3**

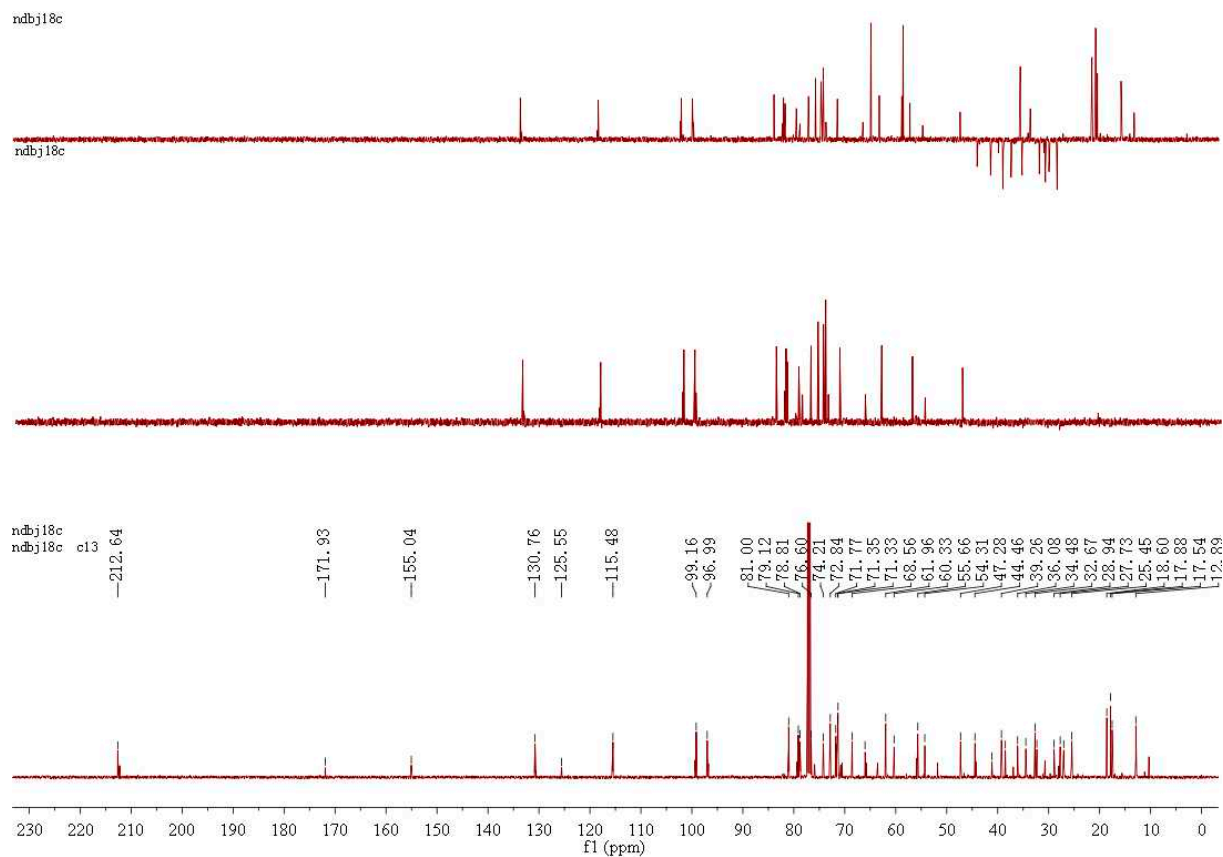

**Figure S17**  $^{13}\text{C}$ -NMR (125 MHz,  $\text{CDCl}_3$ ) and DEPT spectrum of compound **3**

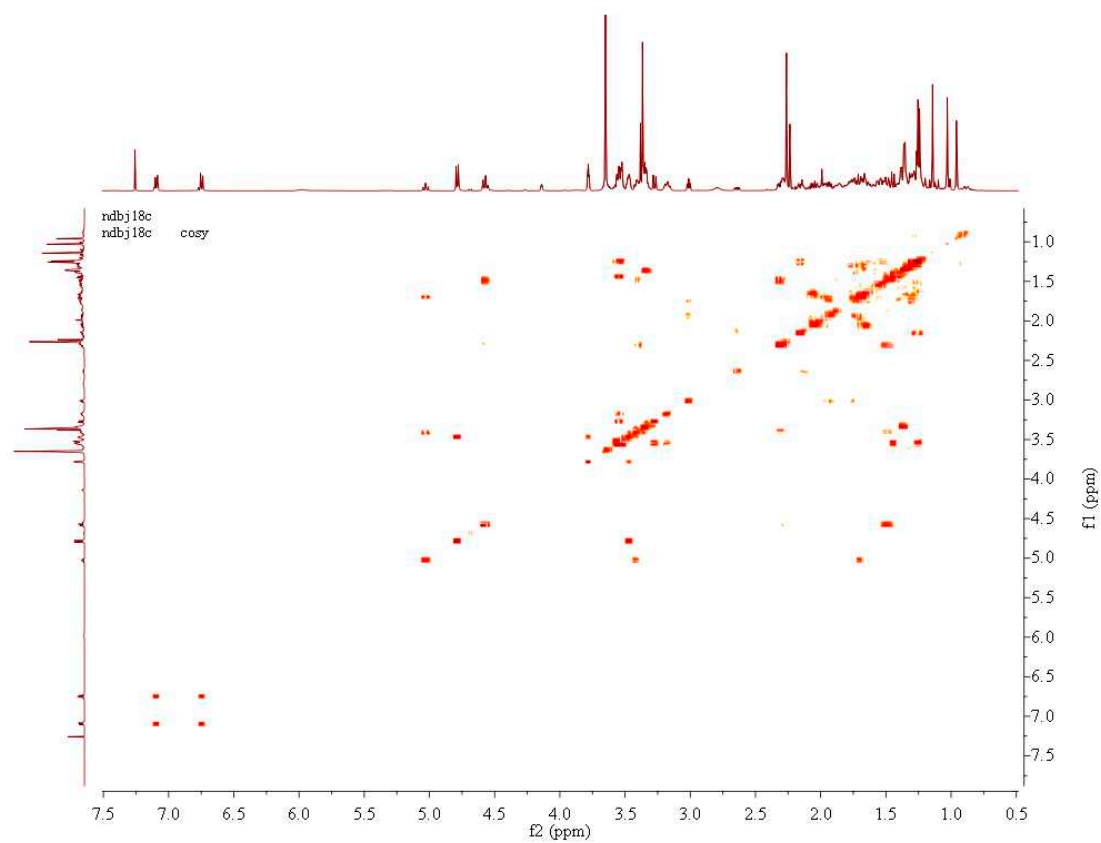

**Figure S18**  $^1\text{H}$ - $^1\text{H}$  COSY spectrum of compound **3**

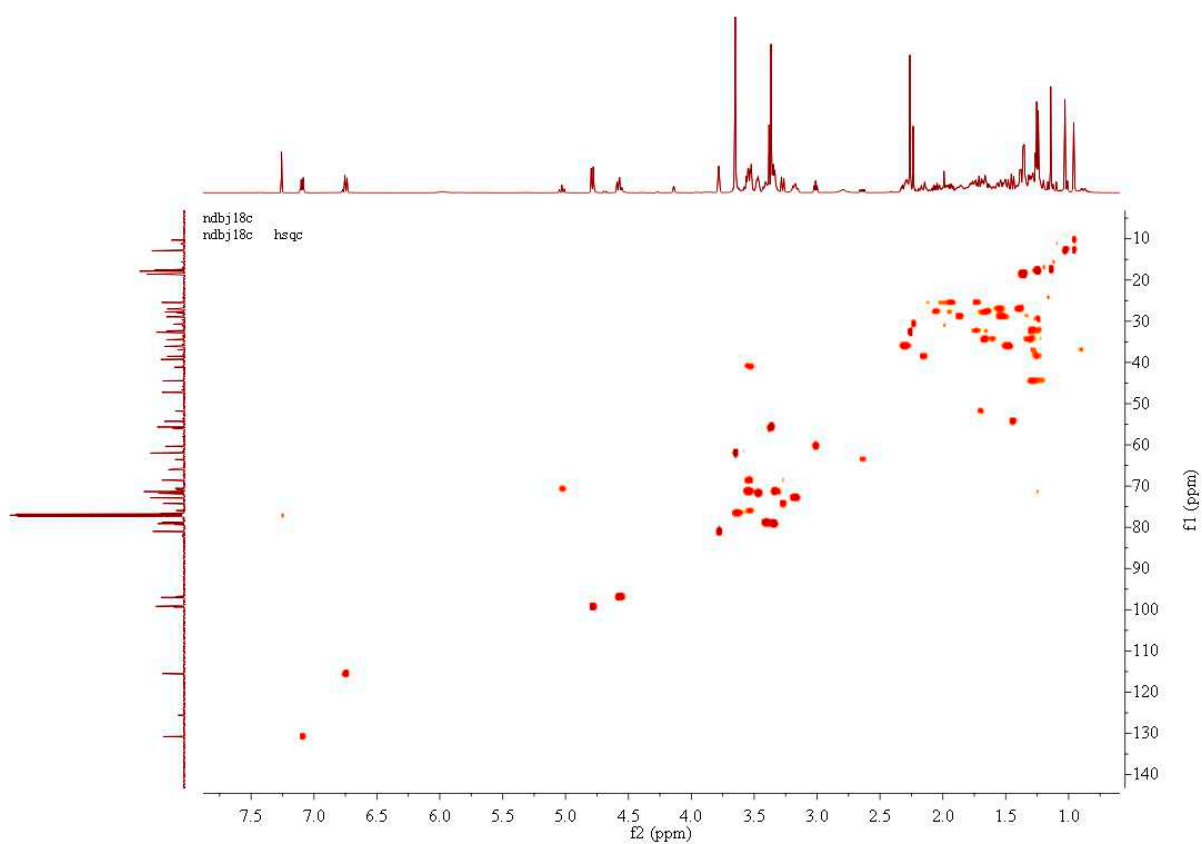

**Figure S19** HSQC spectrum of compound **3**

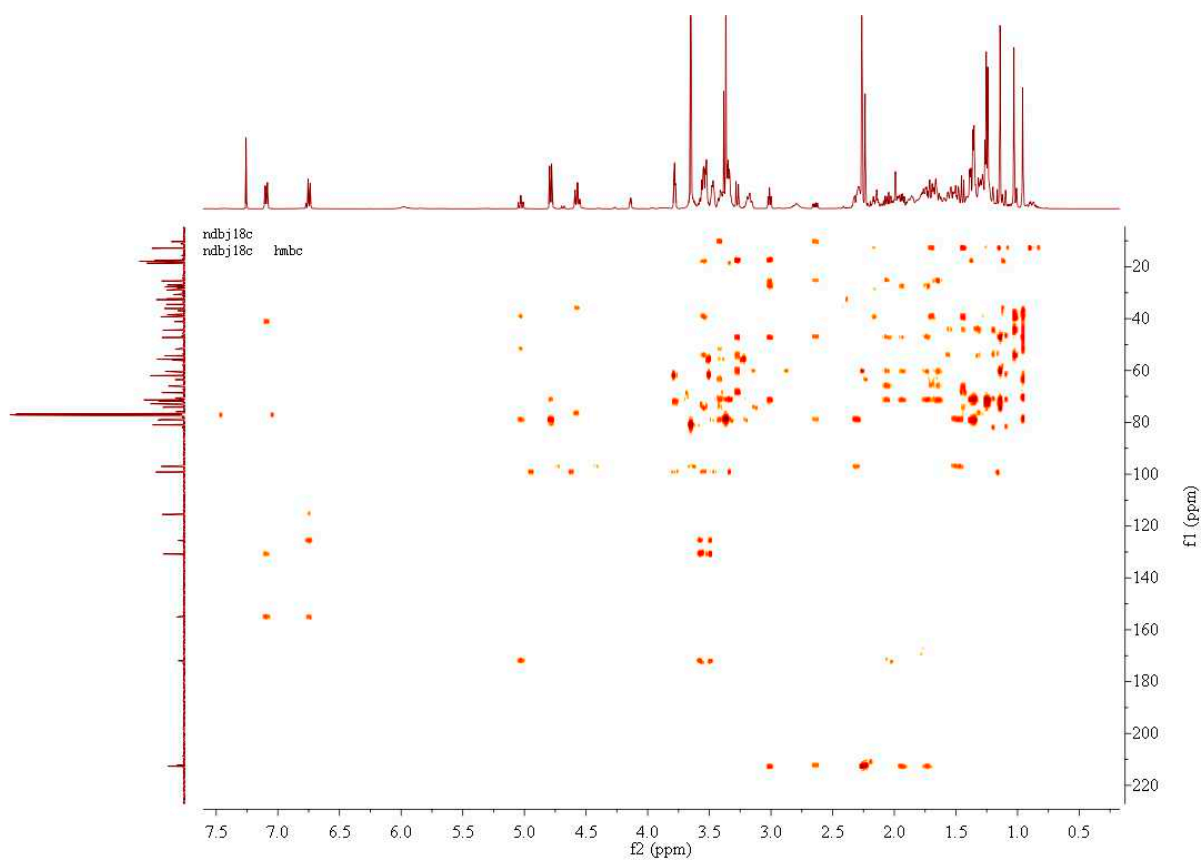

**Figure S20** HMBC Spectrum of Compound **3**

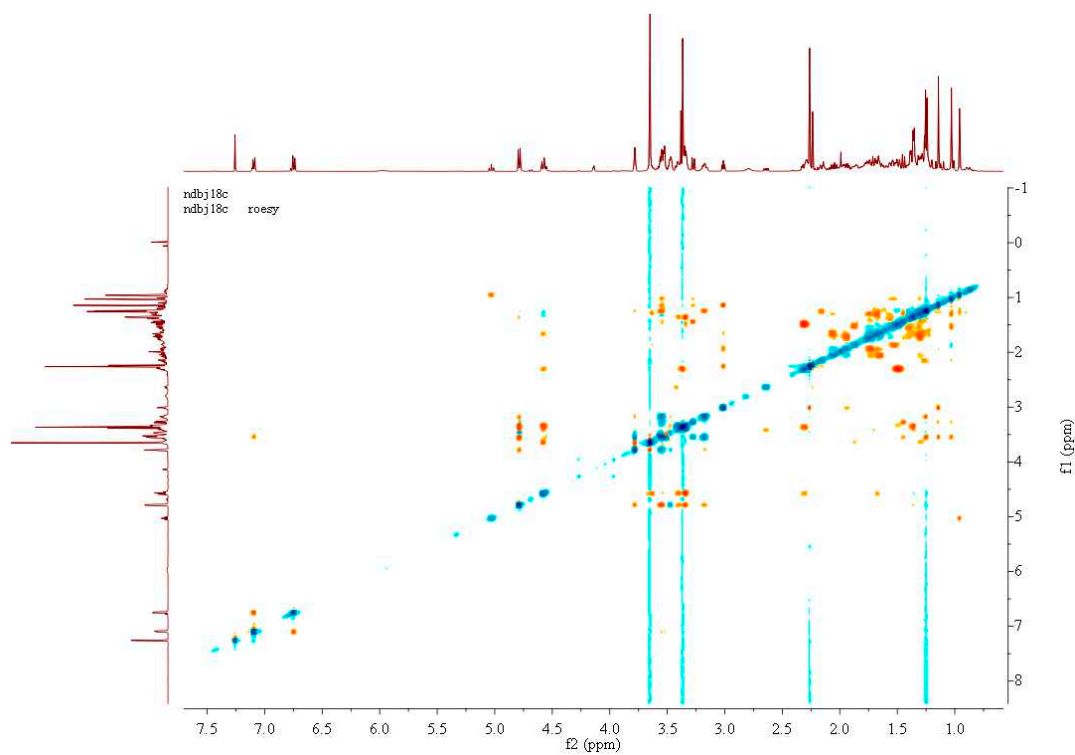

**Figure S21** ROESY spectrum of compound **3**



## Qualitative Analysis Report

|                               |              |                      |                       |
|-------------------------------|--------------|----------------------|-----------------------|
| <b>Data Filename</b>          | ndbj-24.d    | <b>Sample Name</b>   | ndbj-24               |
| <b>Sample Type</b>            | Sample       | <b>Position</b>      | P1-A2                 |
| <b>Instrument Name</b>        | Instrument 1 | <b>User Name</b>     |                       |
| <b>Acq Method</b>             | s.m          | <b>Acquired Time</b> | 11/26/2020 3:37:32 PM |
| <b>IRM Calibration Status</b> | Success      | <b>DA Method</b>     | Default.m             |
| <b>Comment</b>                |              |                      |                       |

|                       |                             |              |
|-----------------------|-----------------------------|--------------|
| <b>Sample Group</b>   |                             | <b>Info.</b> |
| <b>Acquisition SW</b> | 6200 series TOF/6500 series |              |
| <b>Version</b>        | Q-TOF B.05.01 (B5125.2)     |              |

### User Spectra

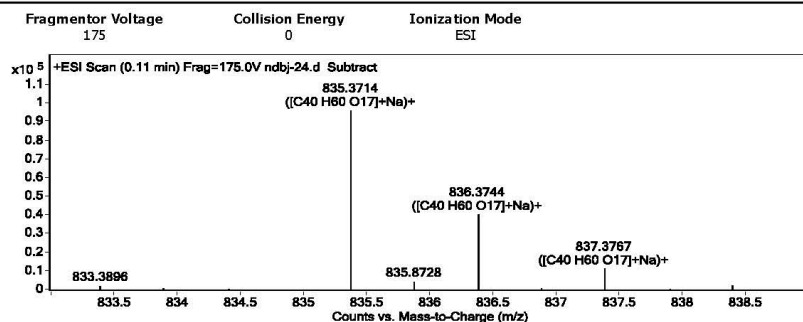

#### Peak List

| m/z       | z | Abund    | Formula     | Ion     |
|-----------|---|----------|-------------|---------|
| 830.4153  | 1 | 48589.8  |             |         |
| 831.4181  | 1 | 21074.41 |             |         |
| 835.3714  | 1 | 96274.69 | C40 H60 O17 | (M+Na)+ |
| 836.3744  | 1 | 40454.15 | C40 H60 O17 | (M+Na)+ |
| 953.4694  | 1 | 16813.27 |             |         |
| 955.4812  | 1 | 11500.18 |             |         |
| 995.4805  | 1 | 33026.6  |             |         |
| 996.4838  | 1 | 16801.98 |             |         |
| 1647.7493 | 1 | 24481.94 |             |         |
| 1648.7539 | 1 | 21411.65 |             |         |

#### Formula Calculator Element Limits

| Element | Min | Max |
|---------|-----|-----|
| C       | 3   | 60  |
| H       | 0   | 120 |
| O       | 0   | 30  |

#### Formula Calculator Results

| Formula     | CalculatedMass | CalculatedMz | Mz       | Diff. (mDa) | Diff. (ppm) | DBE     |
|-------------|----------------|--------------|----------|-------------|-------------|---------|
| C40 H60 O17 | 812.3831       | 835.3723     | 835.3714 | 0.90        | 1.08        | 11.0000 |

--- End Of Report ---

**Figure S22 HRESIMS spectrum of compound 4**



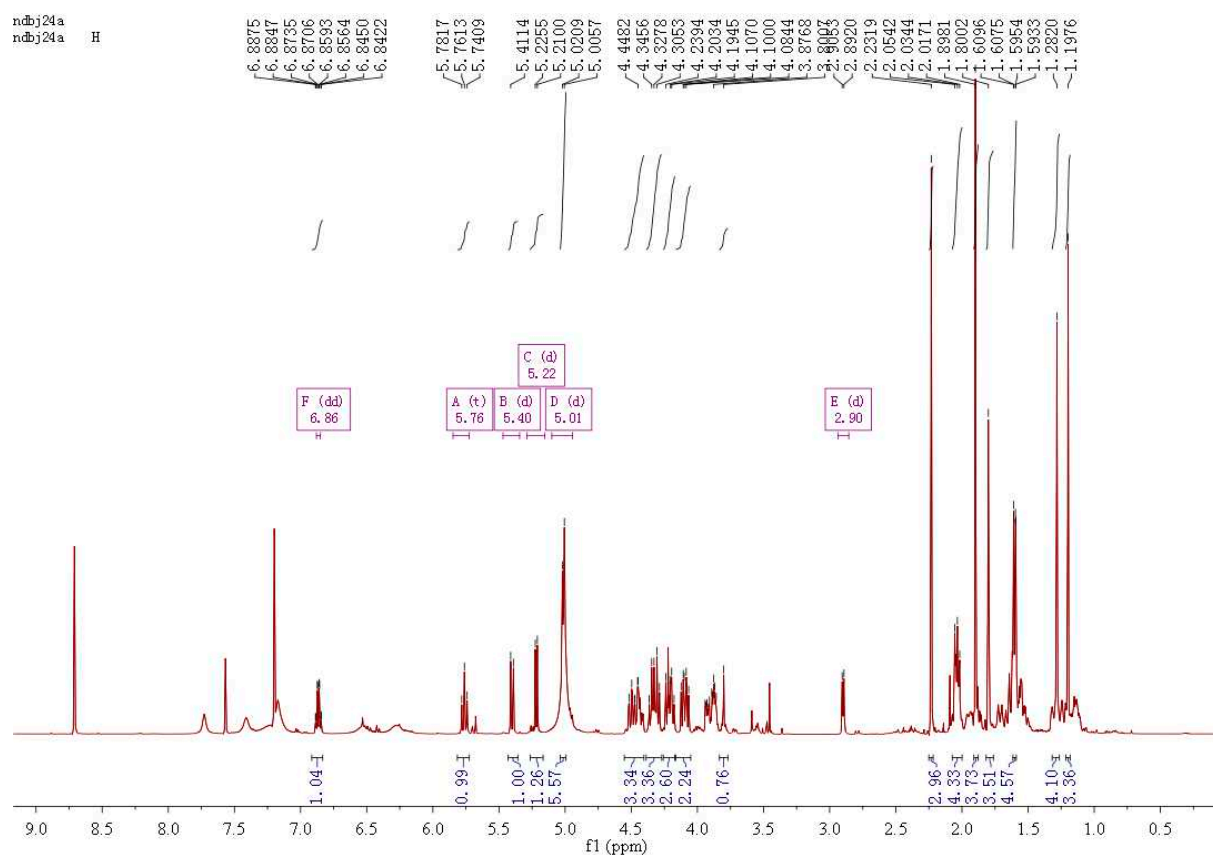

Figure S23  $^1\text{H}$ -NMR (500 MHz, pyridine- $d_5$ ) spectrum of compound 4

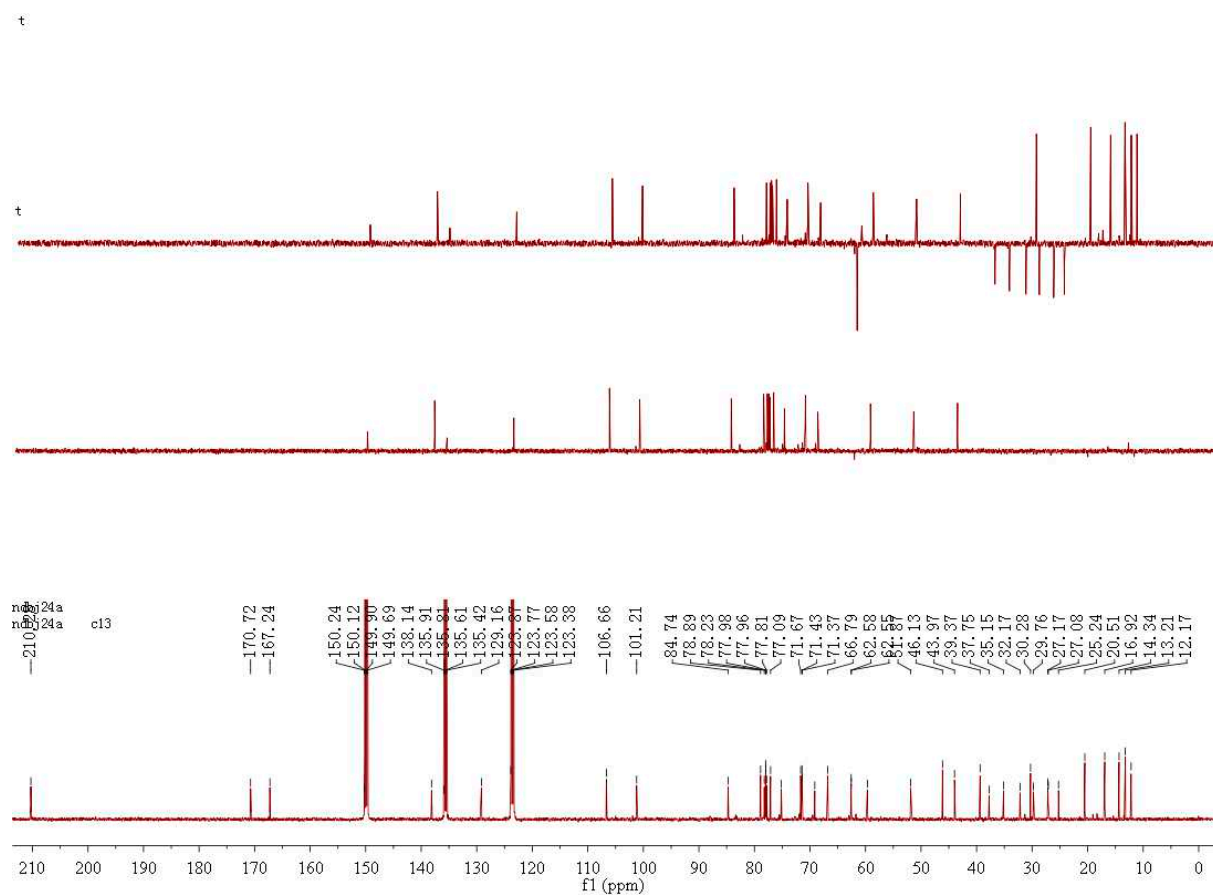

Figure S24  $^{13}\text{C}$ -NMR and DEPT (125 MHz, pyridine- $d_5$ ) spectrum of compound 4

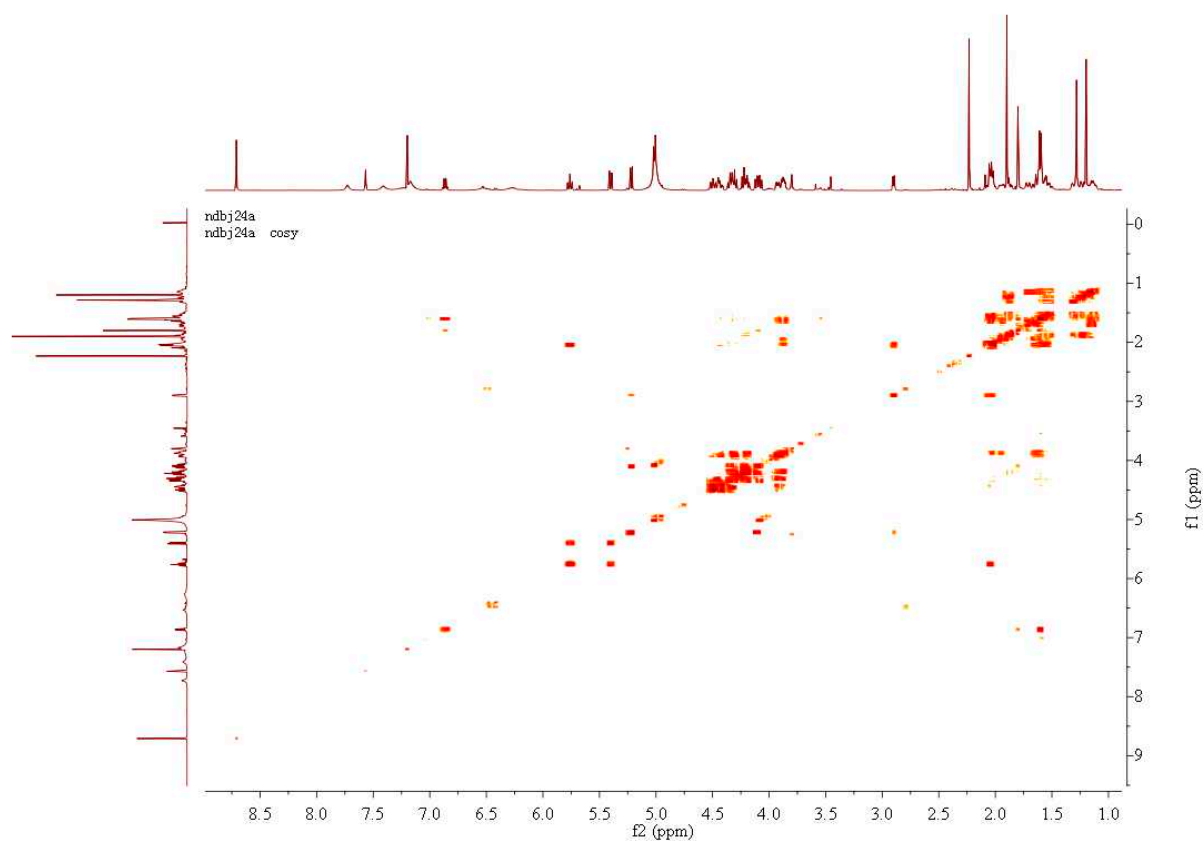

**Figure S25**  $^1\text{H}$ - $^1\text{H}$  COSY spectrum of compound **4**

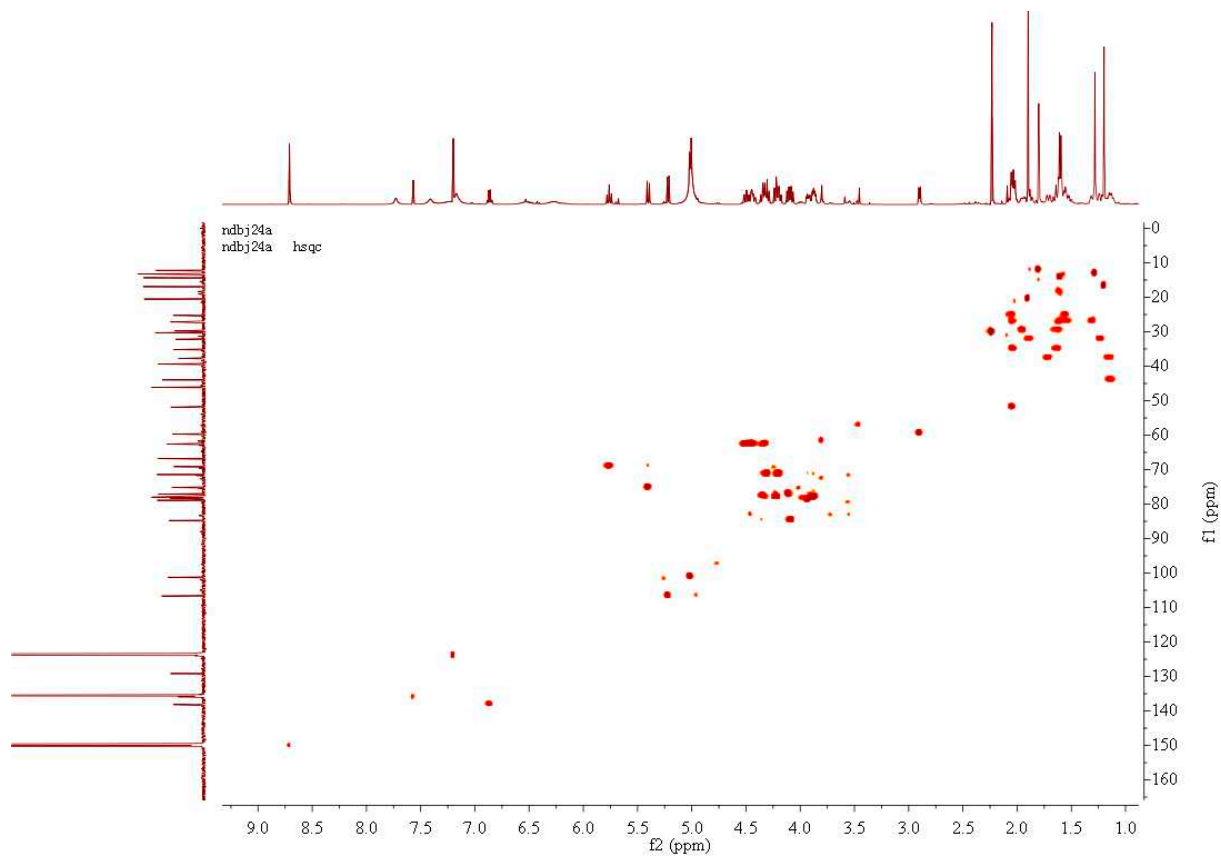

**Figure S26** HSQC spectrum of compound **4**

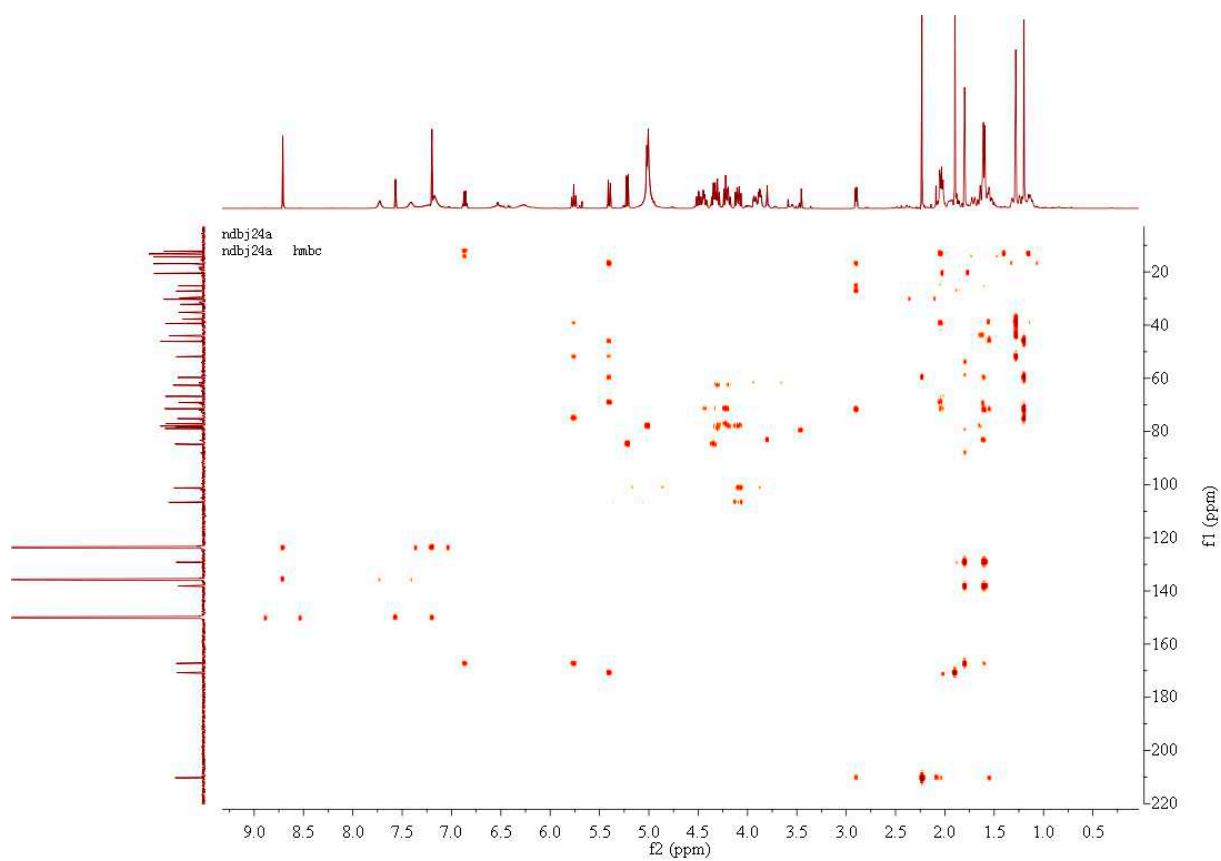

**Figure S27** The HMBC spectrum of compound **4**

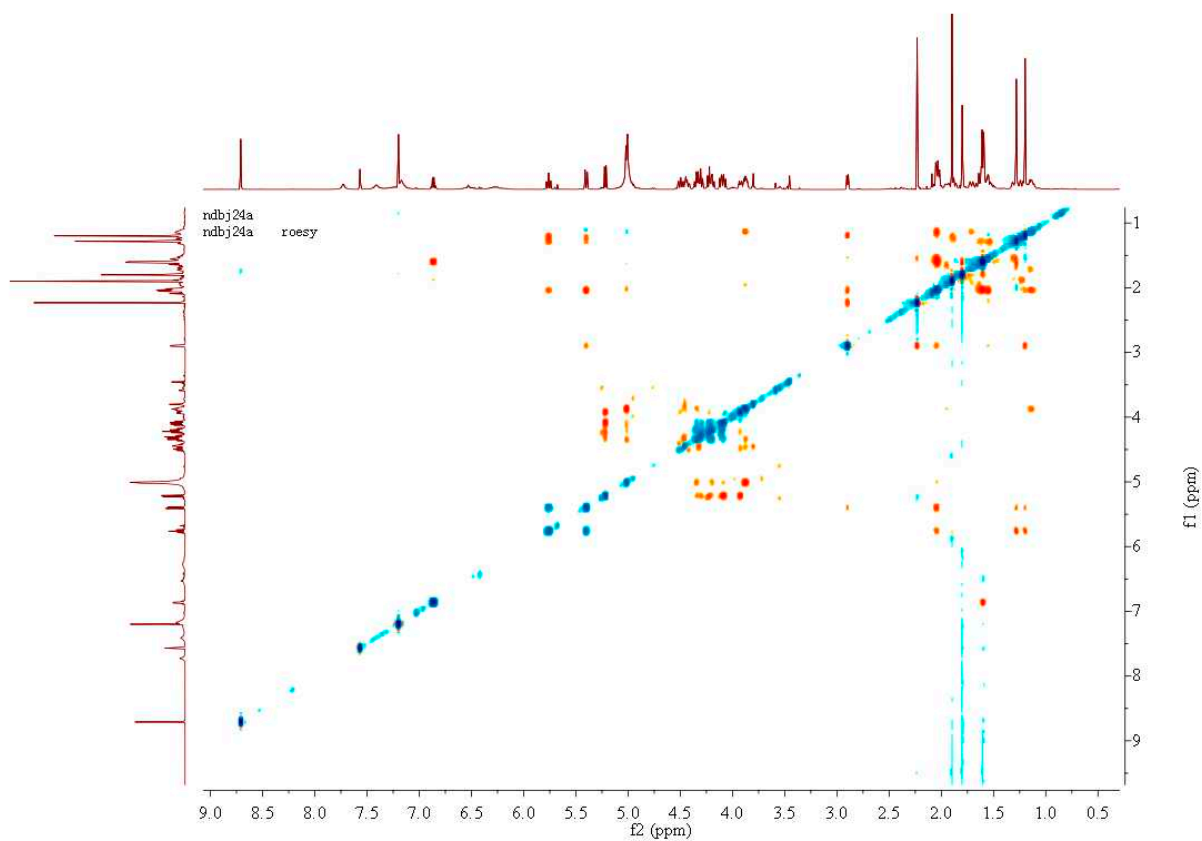

**Figure S28** ROESY spectrum of compound **4**

## Qualitative Analysis Report

|                        |              |               |                       |
|------------------------|--------------|---------------|-----------------------|
| Data Filename          | ndbj-25.d    | Sample Name   | ndbj-25               |
| Sample Type            | Sample       | Position      | P1-C1                 |
| Instrument Name        | Instrument 1 | User Name     |                       |
| Acq Method             | s.m          | Acquired Time | 11/27/2020 3:26:00 PM |
| IRM Calibration Status | Success      | DA Method     | Default.m             |
| Comment                |              |               |                       |

|                |                             |
|----------------|-----------------------------|
| Sample Group   | Info.                       |
| Acquisition SW | 6200 series TOF/6500 series |
| Version        | Q-TOF B.05.01 (B5125.2)     |

### User Spectra

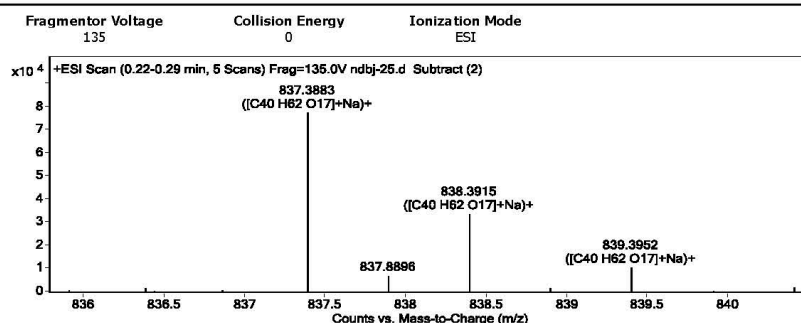

#### Peak List

| m/z       | z | Abund     | Formula     | Ion     |
|-----------|---|-----------|-------------|---------|
| 112.1875  |   | 30322.51  |             |         |
| 832.4326  | 1 | 52515.62  |             |         |
| 837.3883  | 1 | 77573.45  | C40 H62 O17 | (M+Na)+ |
| 838.3915  | 1 | 33777     | C40 H62 O17 | (M+Na)+ |
| 853.4192  | 1 | 148654.5  |             |         |
| 854.4221  | 1 | 65545.1   |             |         |
| 955.4875  | 1 | 100281.19 |             |         |
| 956.4909  | 1 | 50290.4   |             |         |
| 1651.7858 | 1 | 27988.96  |             |         |
| 1652.7894 | 1 | 24435.12  |             |         |

#### Formula Calculator Element Limits

| Element | Min | Max |
|---------|-----|-----|
| C       | 3   | 60  |
| H       | 0   | 120 |
| O       | 0   | 30  |

#### Formula Calculator Results

| Formula     | CalculatedMass | CalculatedMz | Mz       | Diff. (mDa) | Diff. (ppm) | DBE     |
|-------------|----------------|--------------|----------|-------------|-------------|---------|
| C40 H62 O17 | 814.3987       | 837.3879     | 837.3883 | -0.40       | -0.48       | 10.0000 |

--- End Of Report ---

Figure S29 HRESIMS spectrum of compound 5

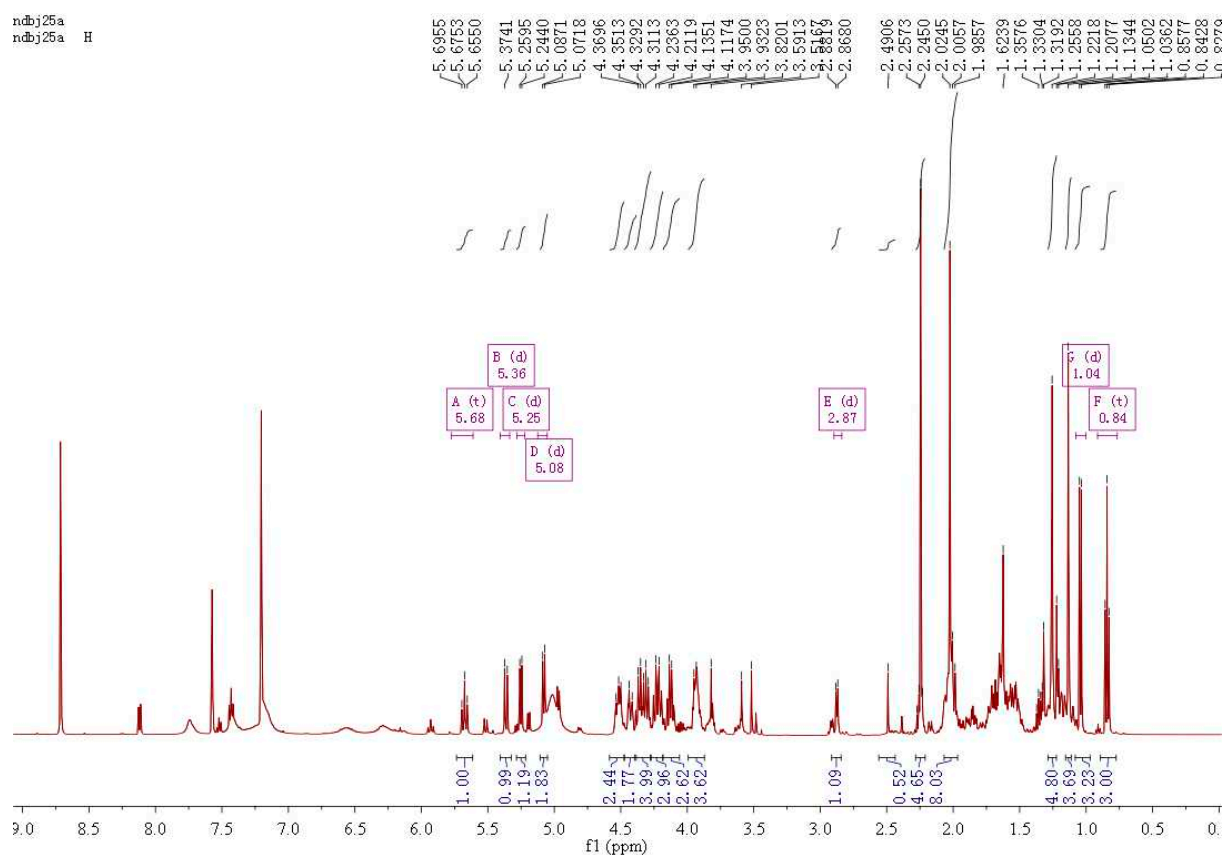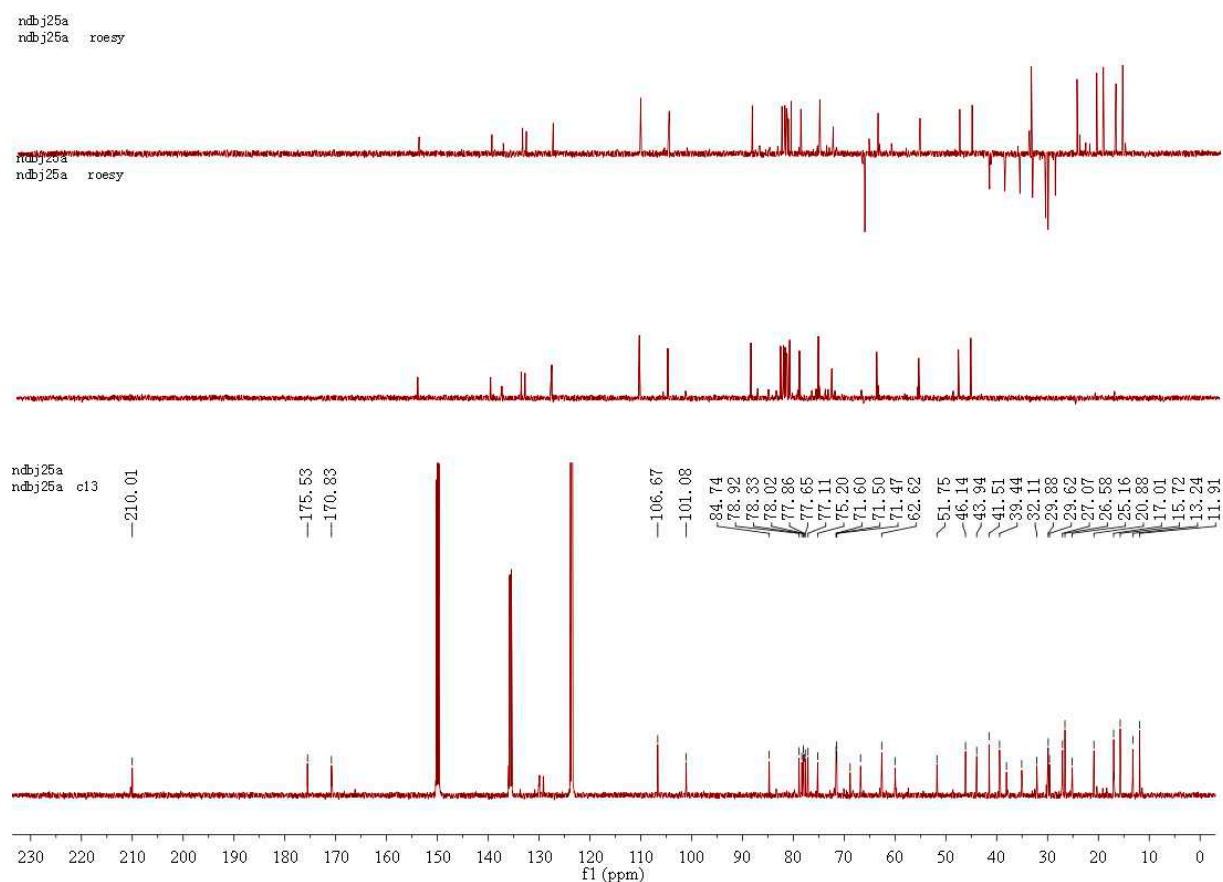

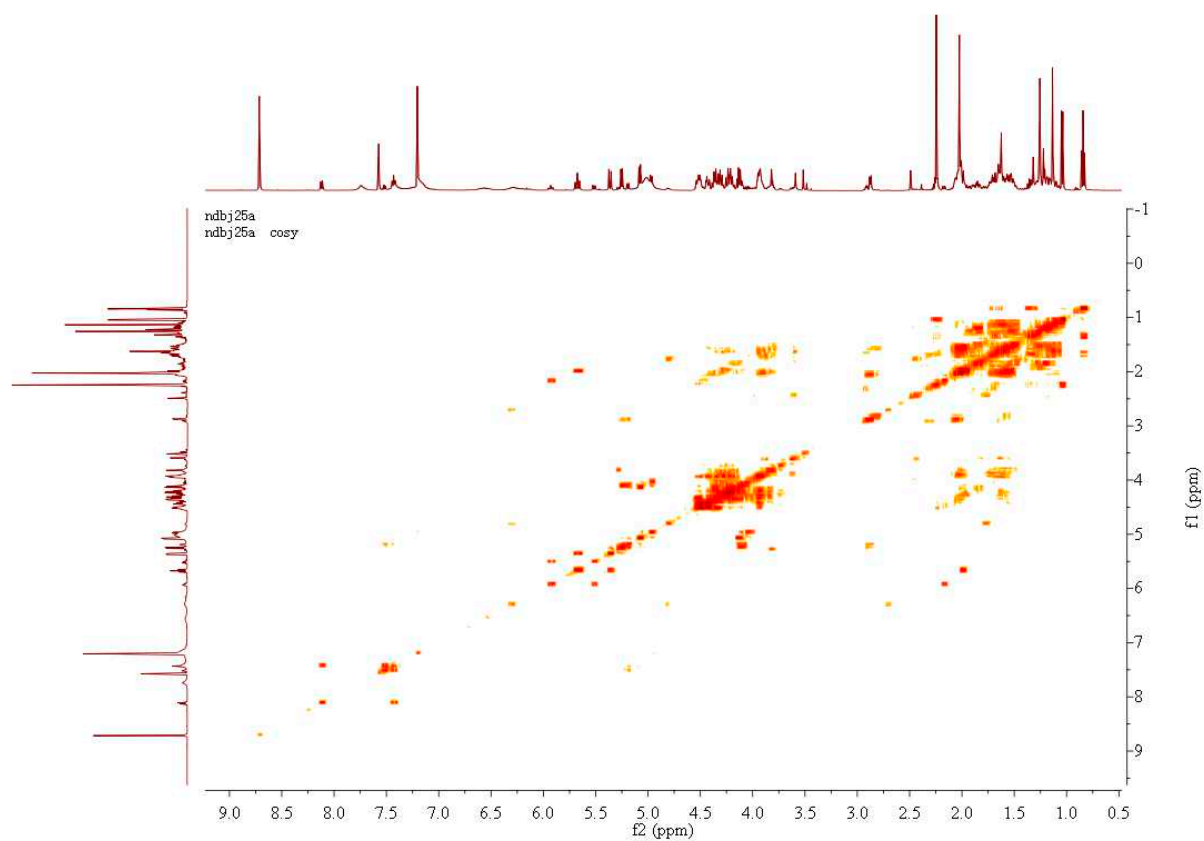

**Figure S32**  $^1\text{H}$ - $^1\text{H}$  COSY spectrum of compound **5**

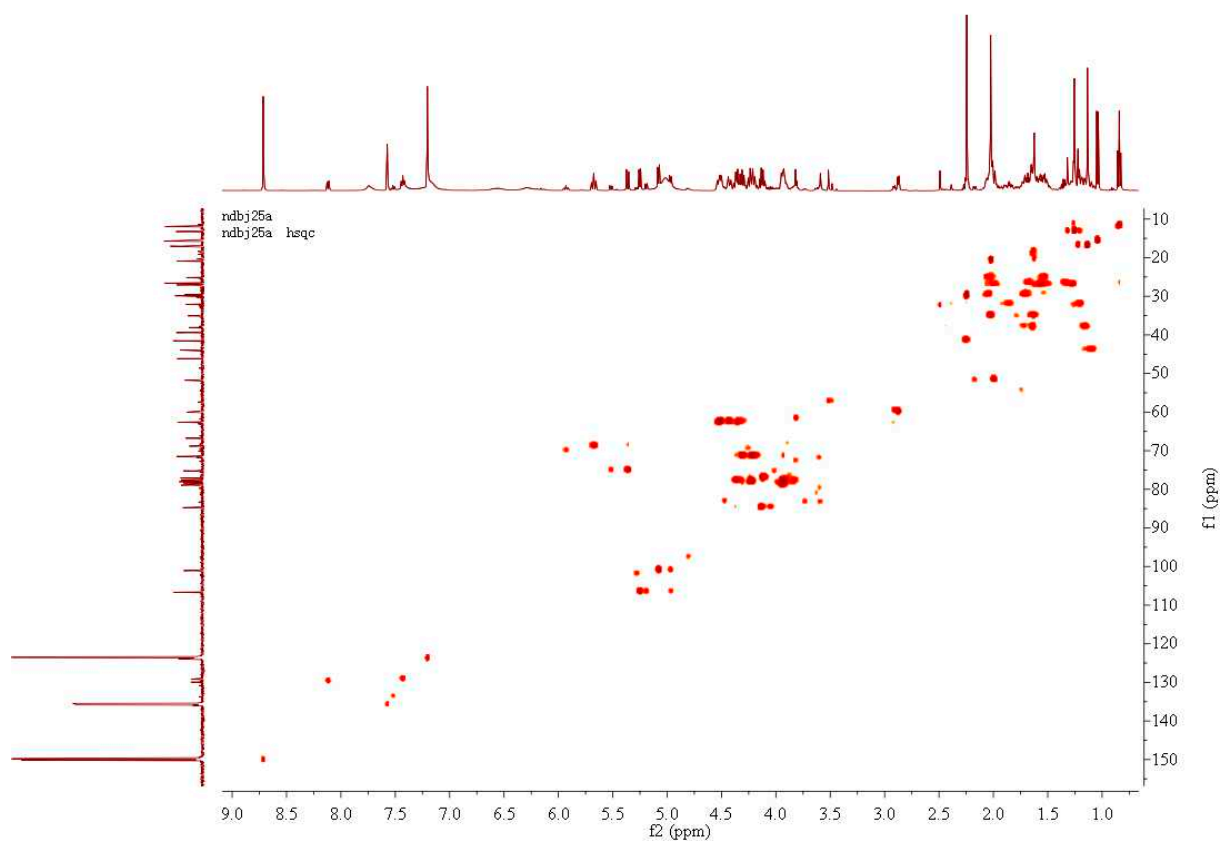

**Figure S33** HSQC spectrum of compound **5**

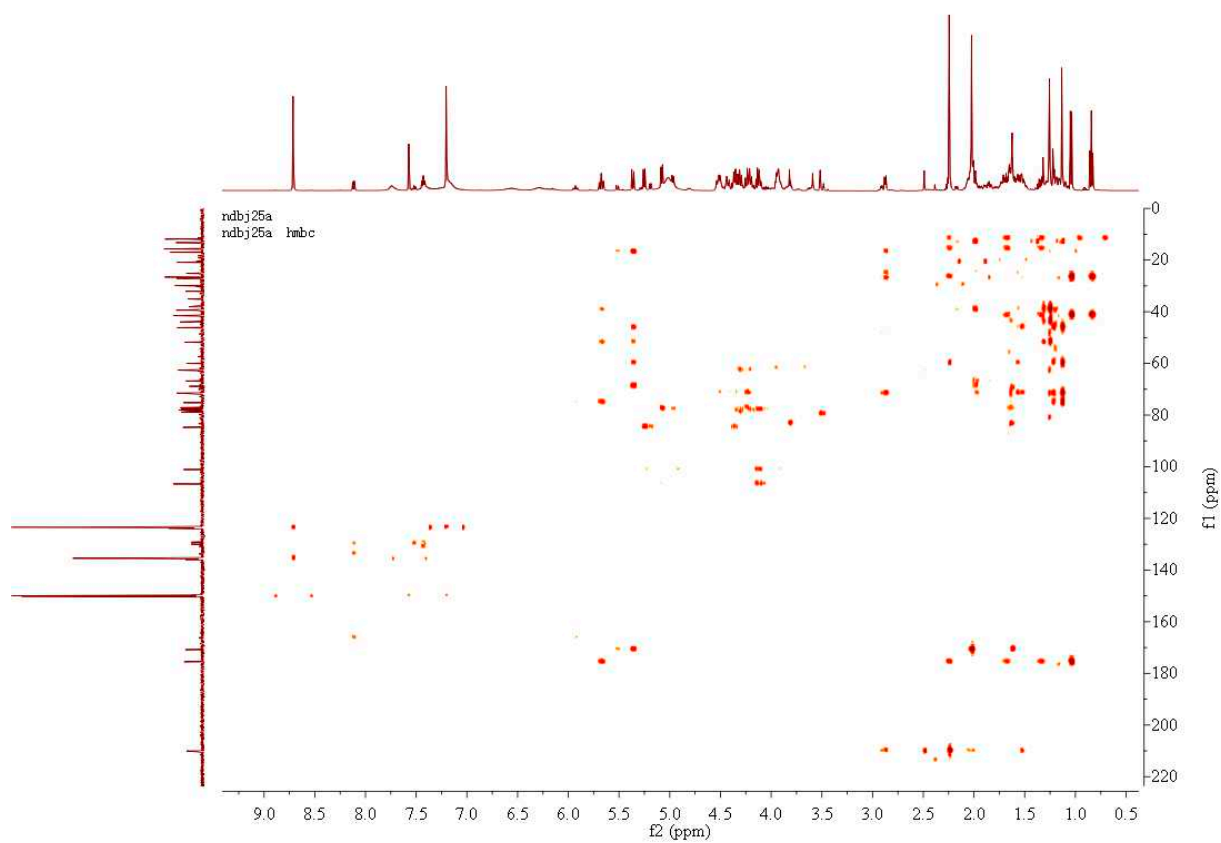

**Figure S34** HMBC spectrum of compound **5**

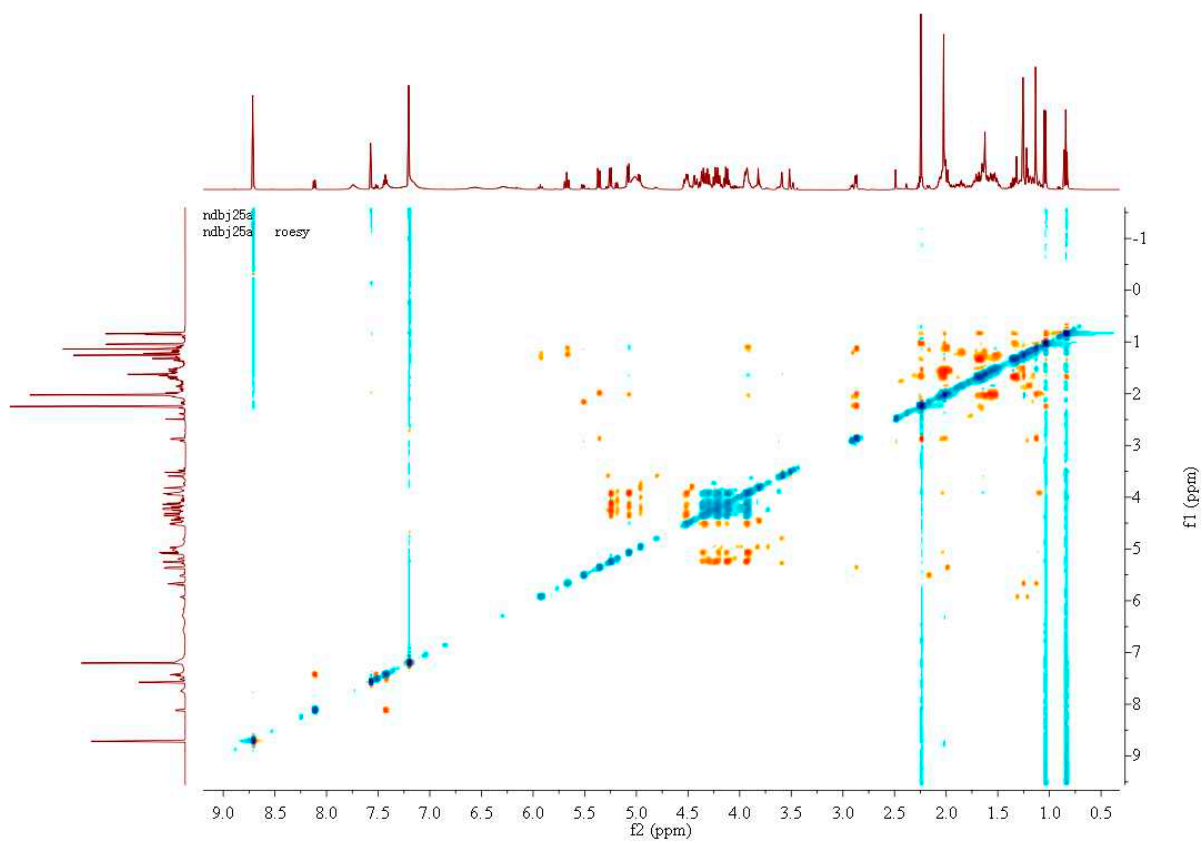

**Figure S35** ROESY spectrum of compound **5**



## Qualitative Analysis Report

|                        |              |               |                       |
|------------------------|--------------|---------------|-----------------------|
| Data Filename          | ndbj-21.d    | Sample Name   | ndbj-21               |
| Sample Type            | Sample       | Position      | P1-A1                 |
| Instrument Name        | Instrument 1 | User Name     |                       |
| Acq Method             | s.m          | Acquired Time | 11/26/2020 3:36:21 PM |
| IRM Calibration Status | Success      | DA Method     | Default.m             |
| Comment                |              |               |                       |

|                |                             |
|----------------|-----------------------------|
| Sample Group   | Info.                       |
| Acquisition SW | 6200 series TOF/6500 series |
| Version        | Q-TOF B.05.01 (B5125.2)     |

### User Spectra

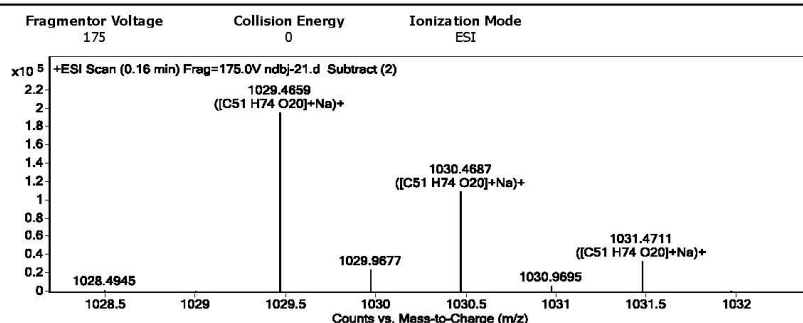

### Peak List

| m/z       | z | Abund     | Formula     | Ion     |
|-----------|---|-----------|-------------|---------|
| 541.2782  | 1 | 12301.04  |             |         |
| 937.4756  | 1 | 40547.91  |             |         |
| 938.4793  | 1 | 18861.75  |             |         |
| 1024.5098 | 1 | 42988.28  |             |         |
| 1025.5133 | 1 | 23825.68  |             |         |
| 1029.4659 | 1 | 196133.84 | C51 H74 O20 | (M+Na)+ |
| 1029.9677 | 1 | 24163.45  |             |         |
| 1030.4687 | 1 | 109558.27 | C51 H74 O20 | (M+Na)+ |
| 1031.4711 | 1 | 33537.78  | C51 H74 O20 | (M+Na)+ |
| 1045.4396 | 1 | 14389.06  |             |         |

### Formula Calculator Element Limits

| Element | Min | Max |
|---------|-----|-----|
| C       | 3   | 60  |
| H       | 0   | 120 |
| O       | 0   | 30  |

### Formula Calculator Results

| Formula     | CalculatedMass | CalculatedMz | Mz        | Diff. (mDa) | Diff. (ppm) | DBE     |
|-------------|----------------|--------------|-----------|-------------|-------------|---------|
| C51 H74 O20 | 1006.4773      | 1029.4666    | 1029.4659 | 0.70        | 0.68        | 15.0000 |

--- End Of Report ---

Figure S36 HRESIMS spectrum of compound 6



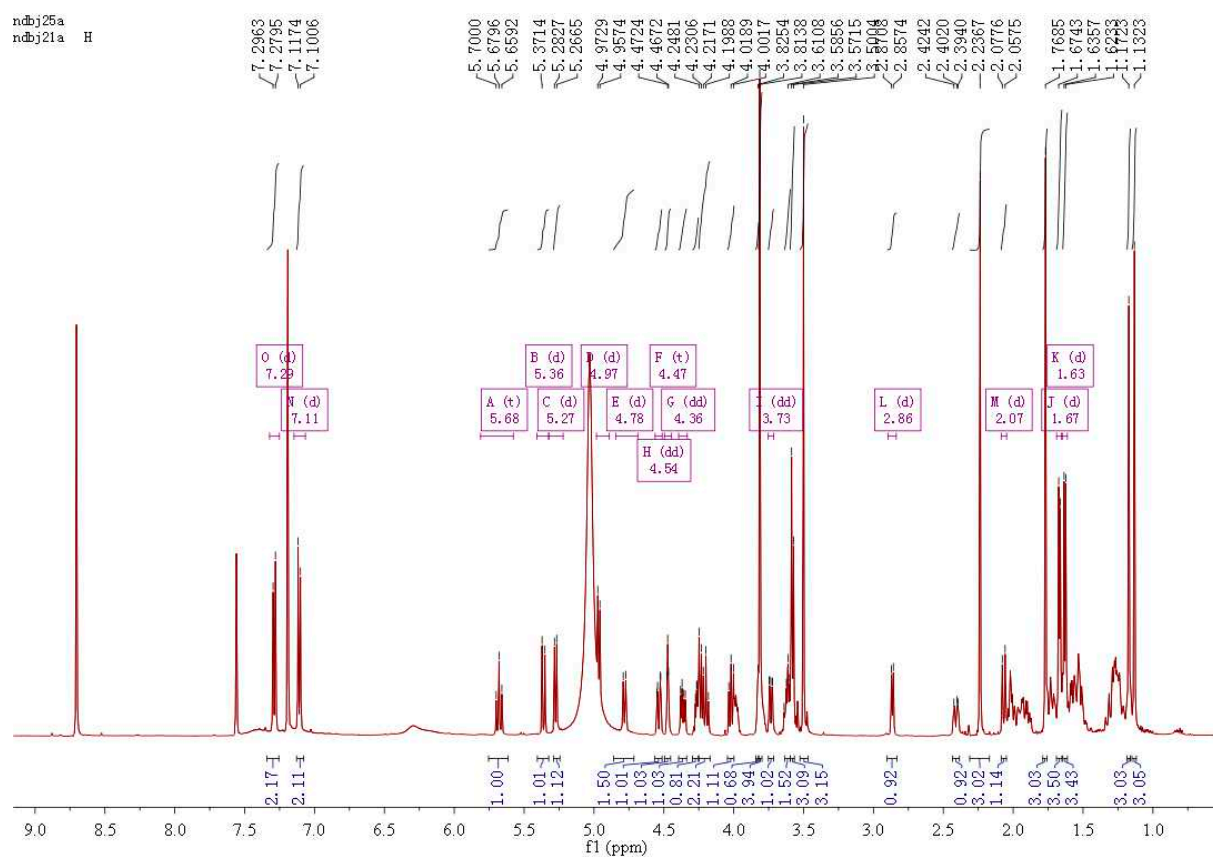

**Figure S37**  $^1\text{H}$ -NMR (500 MHz, pyridine- $d_5$ ) spectrum of compound **6**

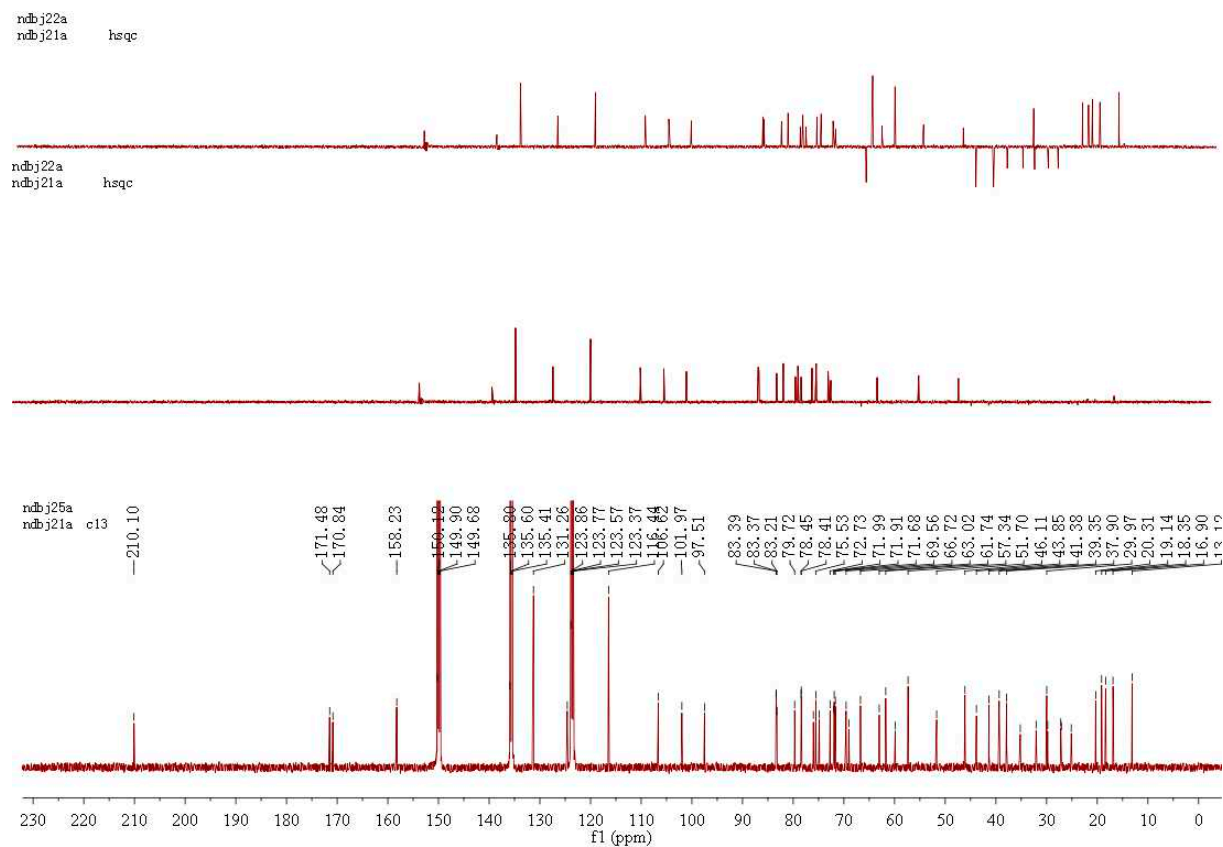

**Figure S38**  $^{13}\text{C}$ -NMR and DEPT (125 MHz, pyridine- $d_5$ ) spectrum of compound **6**

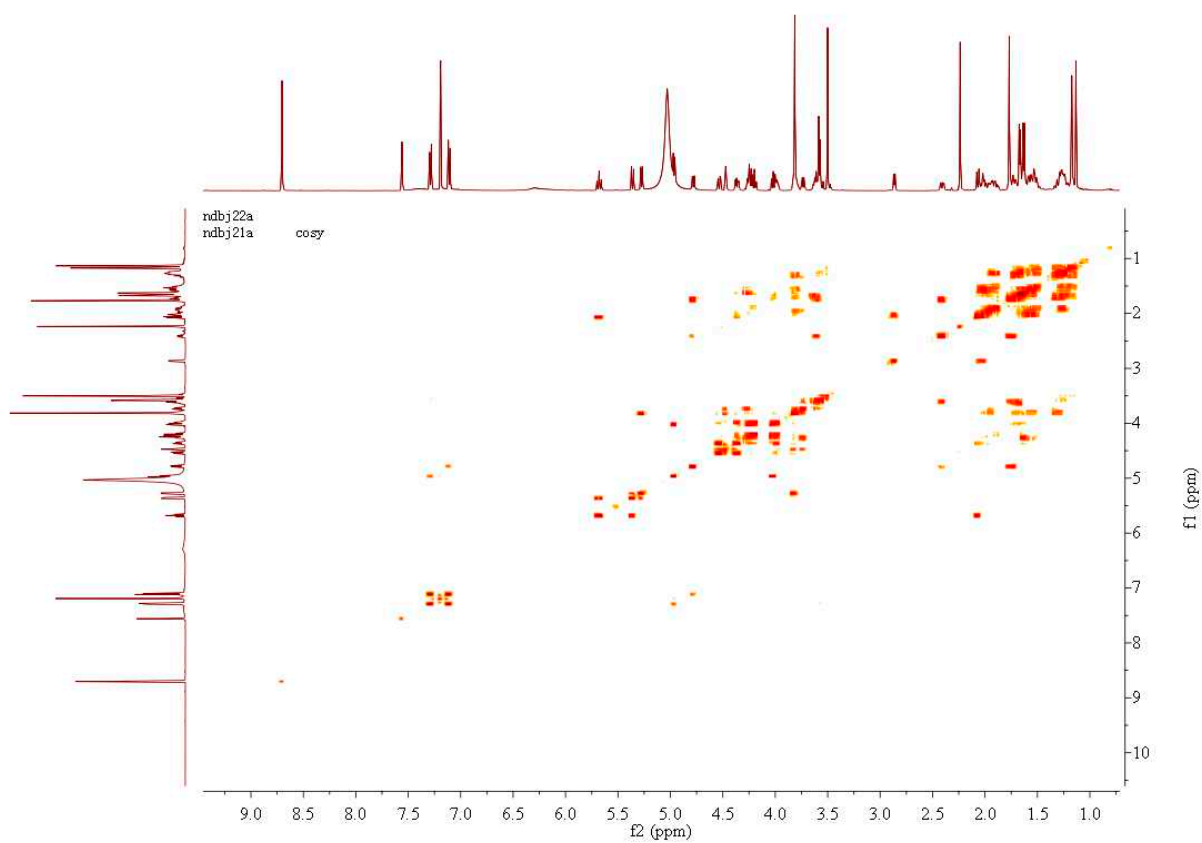

**Figure S39**  $^1\text{H}$ - $^1\text{H}$  COSY spectrum of compound **6**

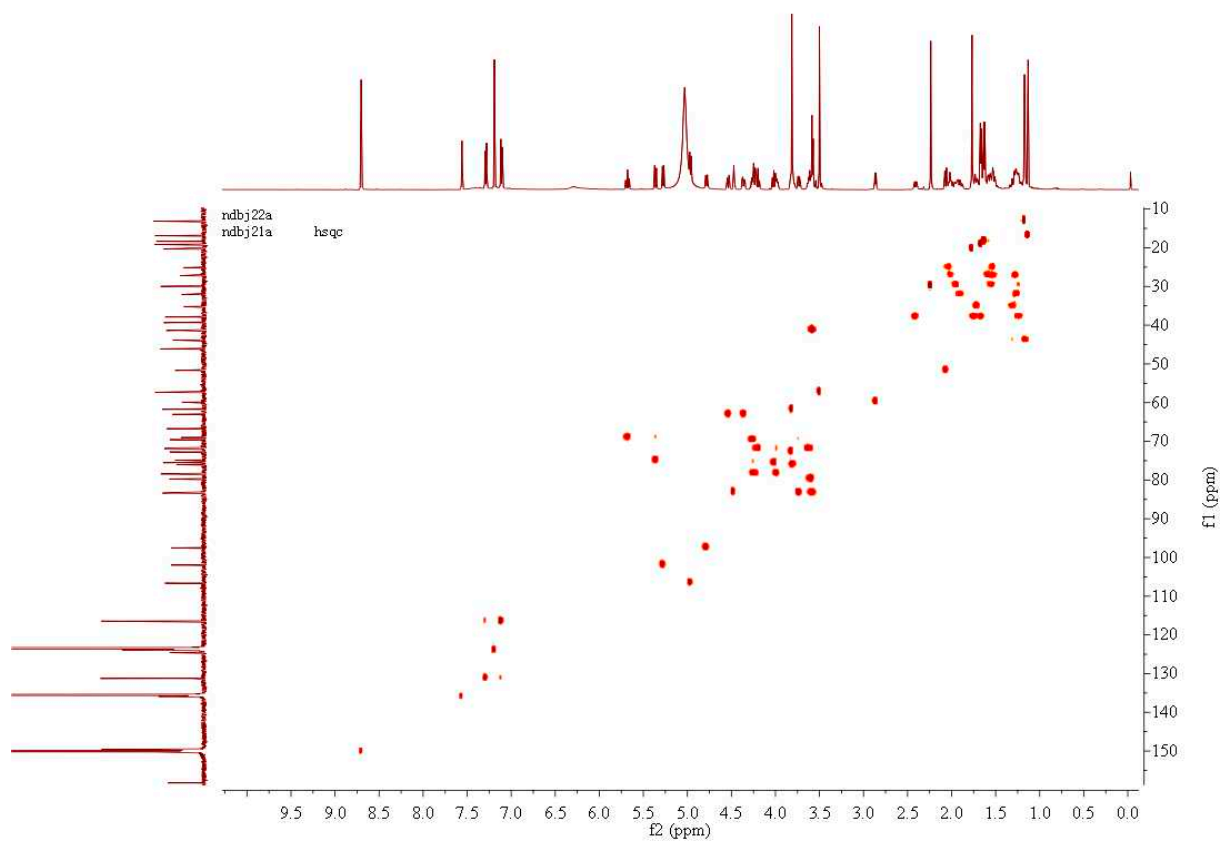

**Figure S40** HSQC spectrum of compound **6**

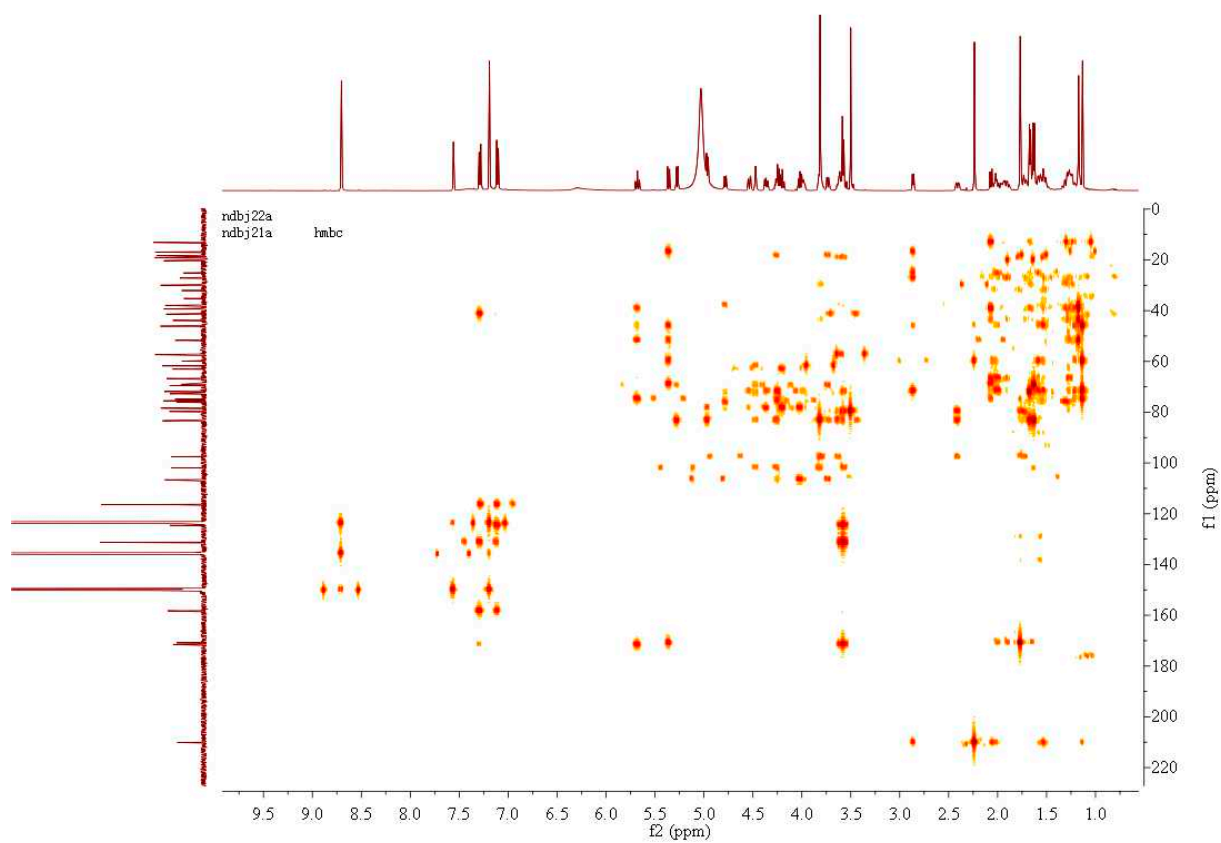

**Figure S41** HMBC spectrum of compound **6**

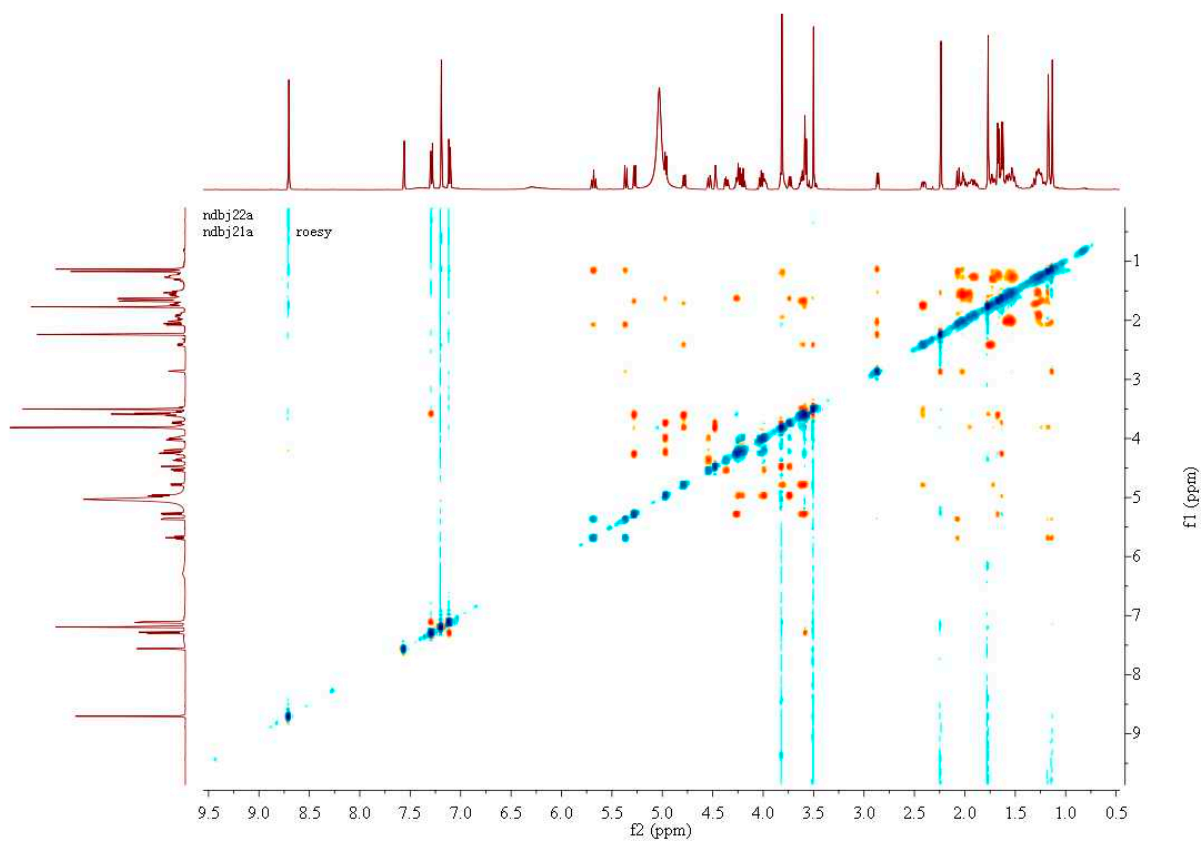

**Figure S42** ROESY spectrum of compound **6**

## Qualitative Analysis Report

|                               |                      |                      |                       |
|-------------------------------|----------------------|----------------------|-----------------------|
| <b>Data Filename</b>          | 20221124ESIA7.d      | <b>Sample Name</b>   | ndbj-43               |
| <b>Sample Type</b>            | Sample               | <b>Position</b>      |                       |
| <b>Instrument Name</b>        | Agilent G6230 TOF MS | <b>User Name</b>     | KIB                   |
| <b>Acq Method</b>             | ESI.m                | <b>Acquired Time</b> | 11/24/2022 4:10:23 PM |
| <b>IRM Calibration Status</b> | Success              | <b>DA Method</b>     | ESI.m                 |
| <b>Comment</b>                |                      |                      |                       |

  

|                       |                             |              |
|-----------------------|-----------------------------|--------------|
| <b>Sample Group</b>   |                             | <b>Info.</b> |
| <b>Acquisition SW</b> | 6200 series TOF/6500 series |              |
| <b>Version</b>        | Q-TOF B.05.01 (B5125.2)     |              |

### User Spectra

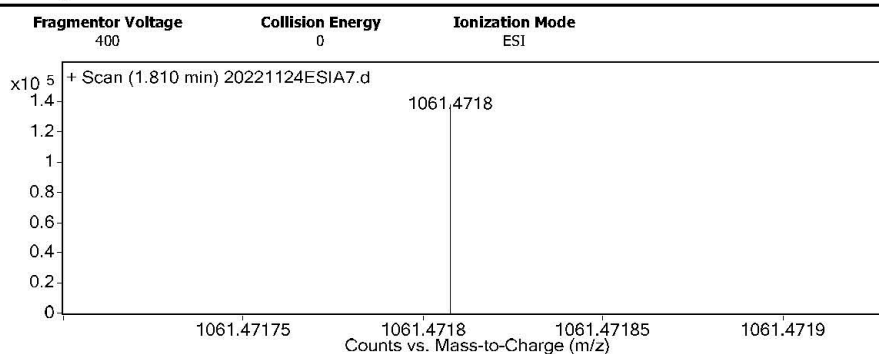

#### Peak List

| m/z       | z | Abund    | Formula        | Ion |
|-----------|---|----------|----------------|-----|
| 857.4657  | 1 | 33723.2  |                |     |
| 922.0098  | 1 | 48368.4  |                |     |
| 1019.5185 | 1 | 54652.85 |                |     |
| 1020.5211 | 1 | 28420.66 |                |     |
| 1027.4868 | 1 | 36759.5  |                |     |
| 1028.4885 | 1 | 20096.37 |                |     |
| 1061.4718 | 1 | 137733.5 | C55 H74 Na O19 | M+  |
| 1062.4747 | 1 | 78992.97 | C55 H74 Na O19 | M+  |
| 1063.477  | 1 | 23792.72 | C55 H74 Na O19 | M+  |
| 1181.5688 | 1 | 20248    |                |     |

#### Formula Calculator Element Limits

| Element | Min | Max |
|---------|-----|-----|
| C       | 0   | 200 |
| H       | 0   | 400 |
| O       | 15  | 23  |
| Na      | 1   | 1   |

#### Formula Calculator Results

| Formula        | CalculatedMass | Mz        | Diff.(mDa) | Diff. (ppm) | DBE  |
|----------------|----------------|-----------|------------|-------------|------|
| C55 H74 Na O19 | 1061.4722      | 1061.4718 | 0.4        | 0.4         | 18.5 |

--- End Of Report ---

**Figure S43** HRESIMS spectrum of compound **7**

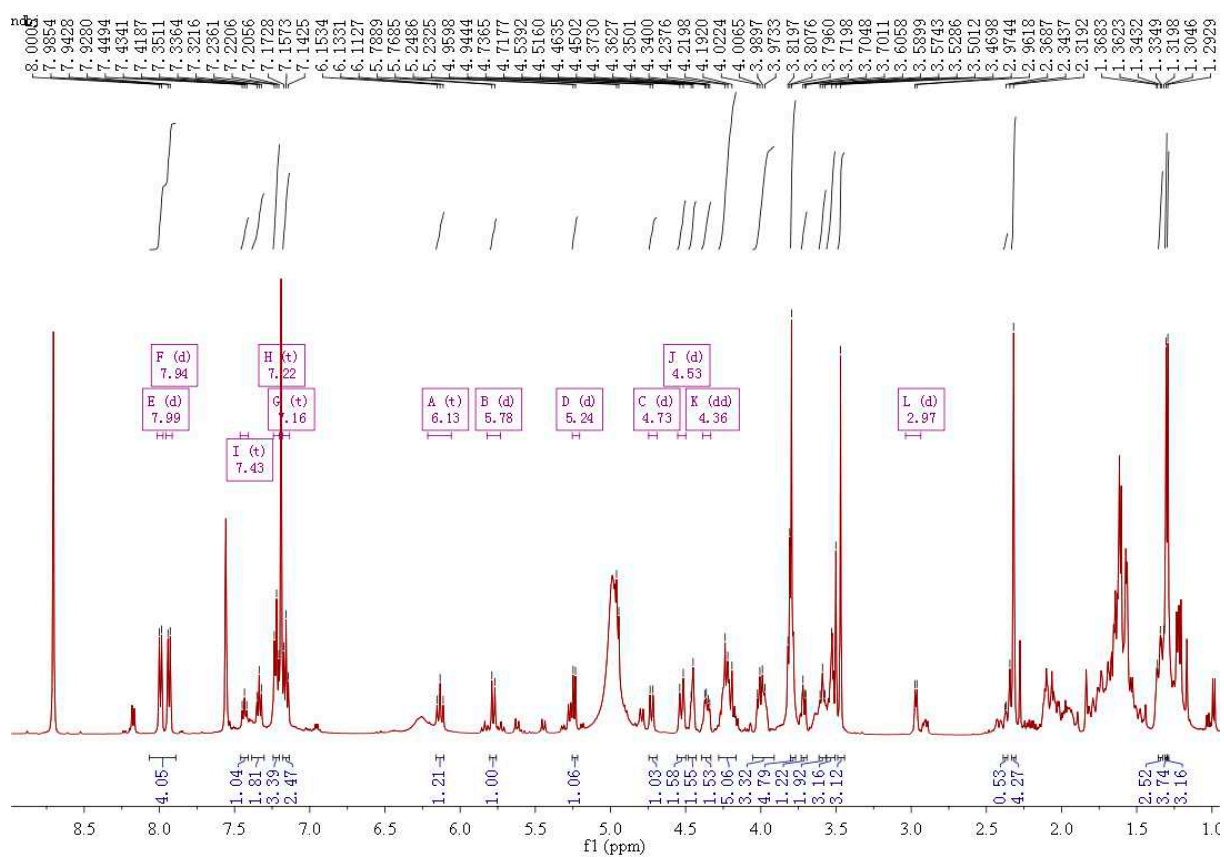

st q-120a

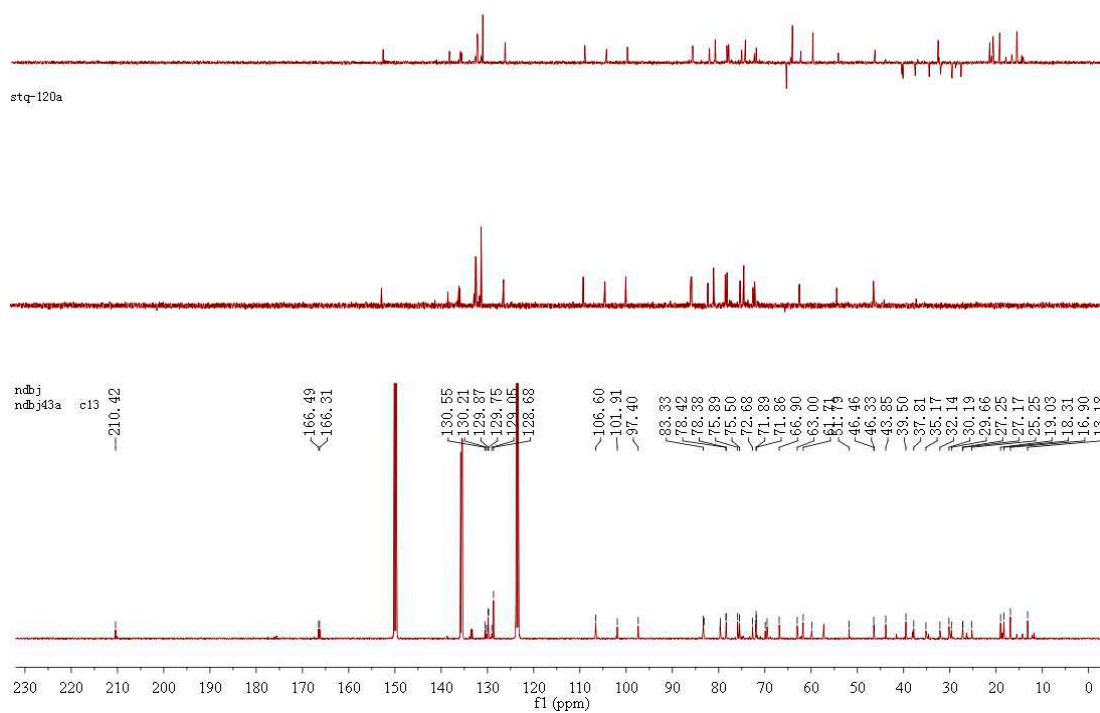

**Figure S45**  $^{13}\text{C}$ -NMR and DEPT (125 MHz, pyridine- $d_5$ ) spectrum of compound **7**

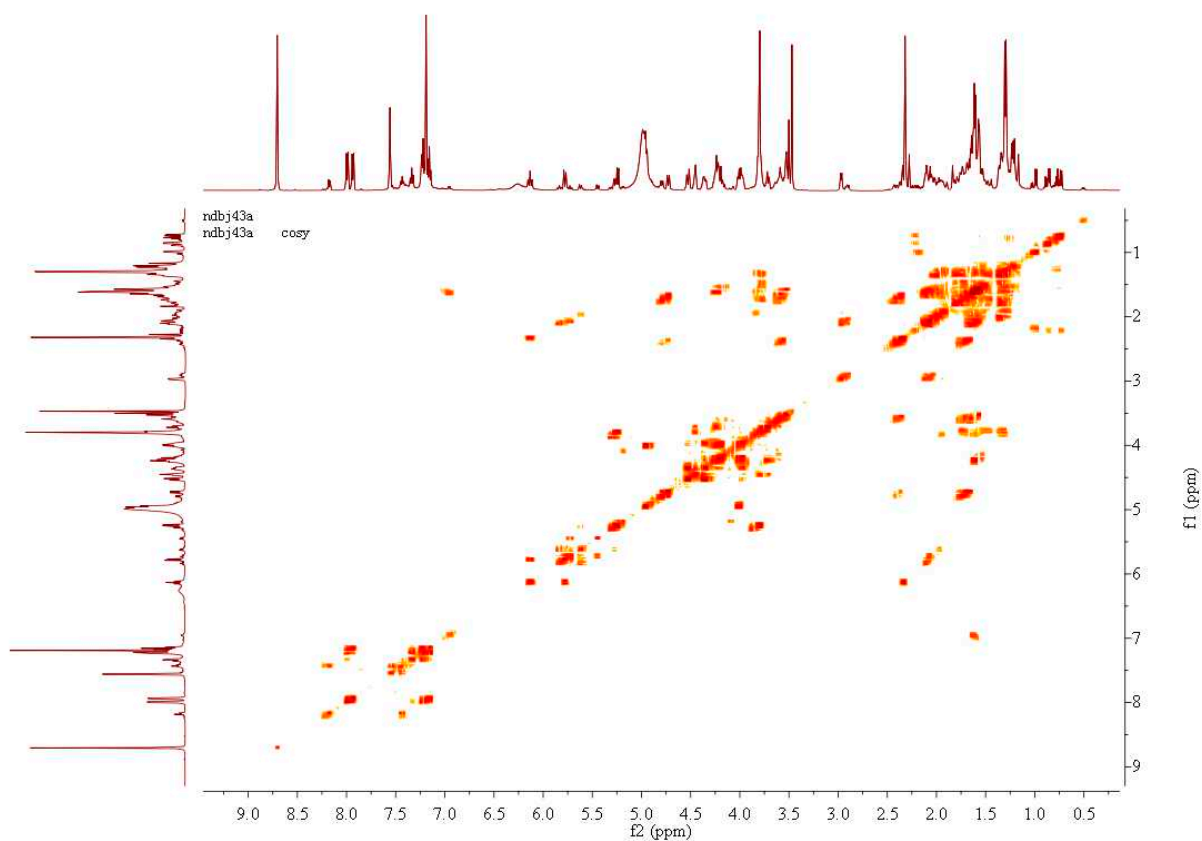

**Figure S46**  $^1\text{H}$ - $^1\text{H}$  COSY spectrum of compound **7**

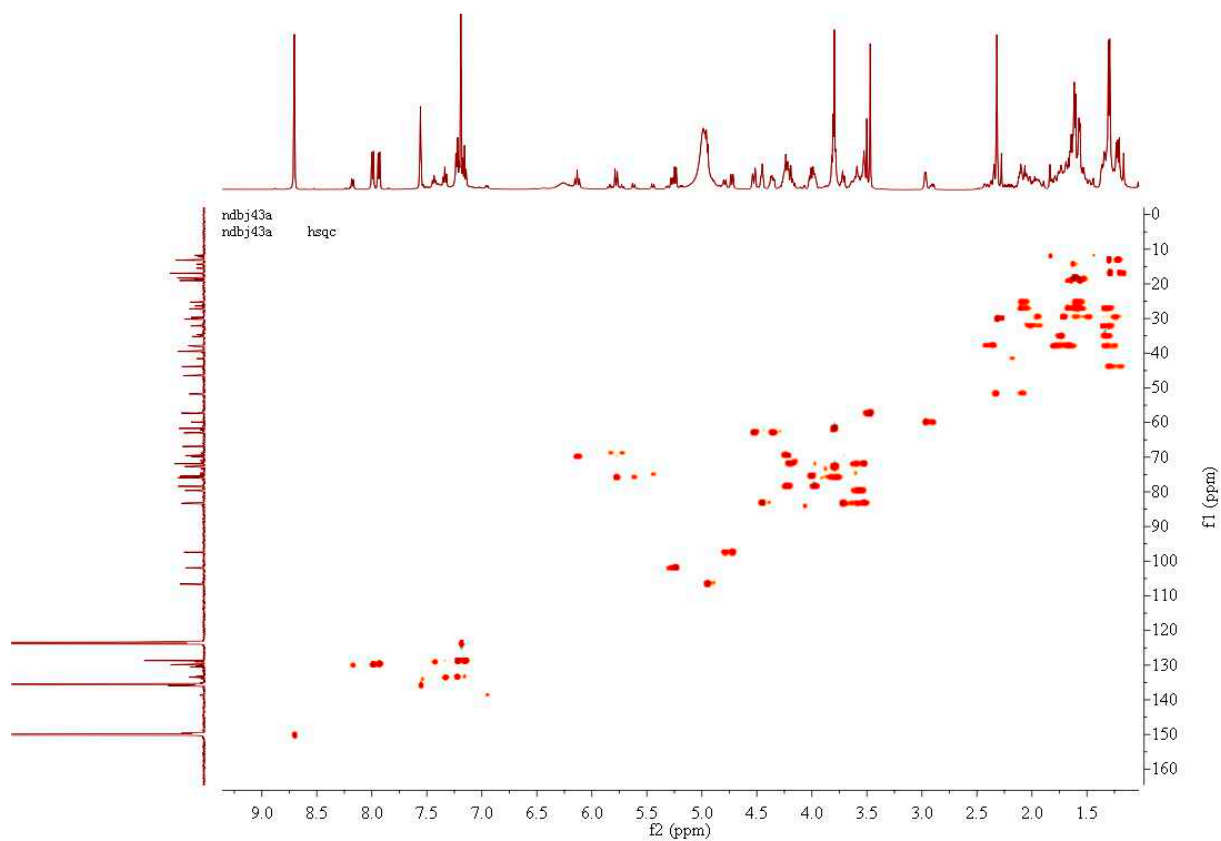

**Figure S47** HSQC spectrum of compound **7**



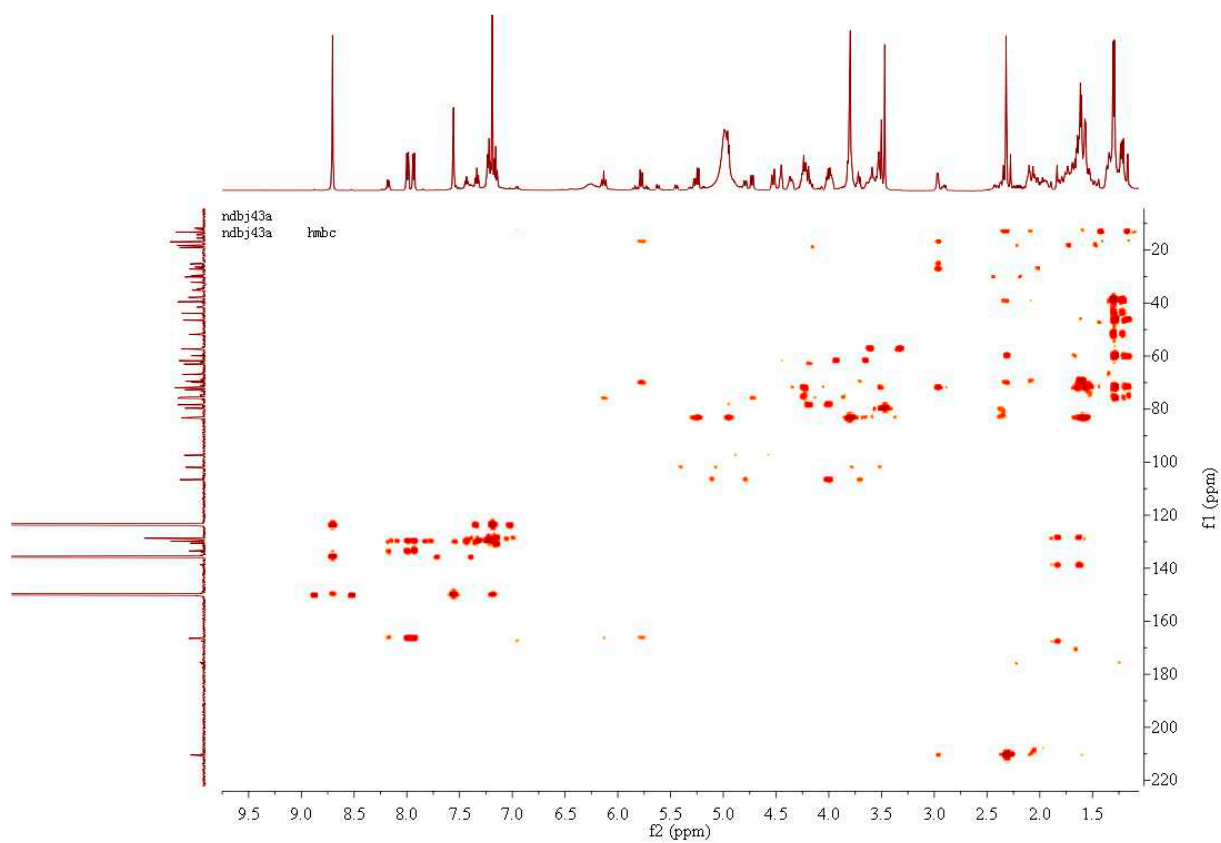

**Figure S48** HMBC spectrum of compound **7**

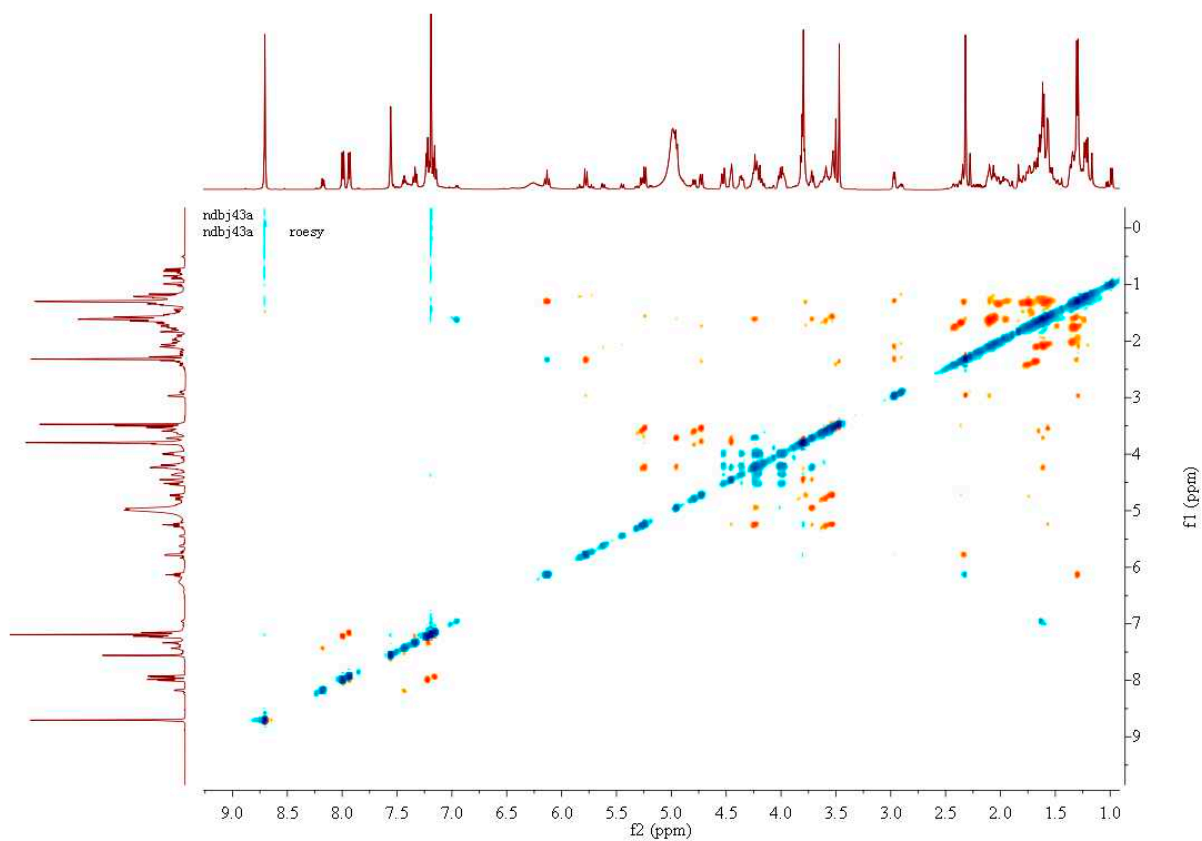

**Figure S49** ROESY spectrum of compound **7**

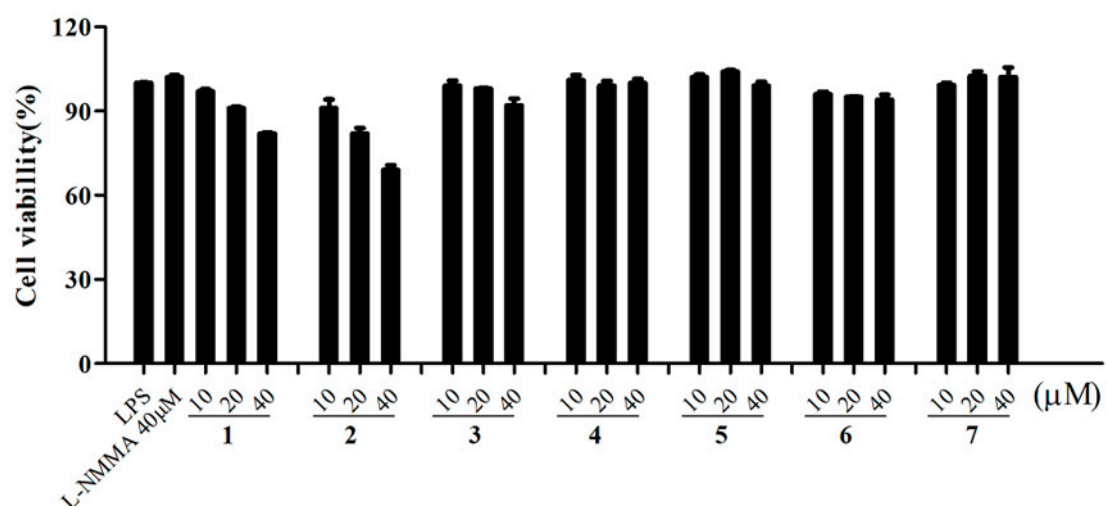

**Figure S50** Effects of compounds 1–7 on cell viability.
